# Supplementary material for: Fecal parasite risk in the endangered proboscis monkey is higher in an anthropogenically managed forest environment compared to a riparian rain forest in Sabah, Borneo
Source: PLoS One. 2018 Apr 9;13(4):e0195584. doi: 10.1371/journal.pone.0195584 (PMC5891069; doi:10.1371/journal.pone.0195584)
Supplement: S1 Appendix — (XLSX) [file pone.0195584.s004.xlsx]

## Sheet: Dataset
Sample no.	Group	Sampling month	Study site	Group type	Sample weight gram	Group size	No. Juveniles	Trichurids presence	Trichurids epg	Trichuris sp. T1 presence	Trichuris sp. T1 epg	Trichuris sp. T2 presence	Trichuris sp. T2 epg	Trichuris sp. T3 presence	Trichuris sp. T3 epg	Anatrichosoma spp. presence	Anatrichosoma spp. epg	Strongylids presence	Strongylids epg	Trichostrongylus presence	Trichostrongylus epg	Oesophagostomum/Ternidens presence	Oesophagostomum/Ternidens epg	Unknown strongylid presence	Unknown strongylid epg	Strongyloides spp. presence	Strongyloides spp. epg	Enterobius presence	Enterobius epg	Ascaris lumbricoides presence	Ascaris lumbricoides epg	PSR
1	G7	June	LKWS	Bachelor	0.171	4	0	yes	11.6959	no	0	yes	11.6959	no	0	no	0	no	0	no	0	no	0	no	0	no	0	no	0	no	0	1
2	G7	June	LKWS	Bachelor	0.606	4	0	yes	173.267	yes	3.30033	yes	169.967	no	0	no	0	no	0	no	0	no	0	no	0	no	0	no	0	yes	1.65017	3
3	G7	June	LKWS	Bachelor	0.429	4	0	yes	4.662	no	0	yes	4.662	no	0	no	0	yes	2.331	no	0	yes	2.331	no	0	no	0	no	0	no	0	2
4	G7	June	LKWS	Bachelor	0.312	4	0	yes	19.2308	no	0	yes	19.2308	no	0	no	0	no	0	no	0	no	0	no	0	no	0	no	0	no	0	1
5	G7	June	LKWS	Bachelor	0.427	4	0	yes	28.103	no	0	yes	28.103	no	0	no	0	yes	2.34192	NA	NA	NA	NA	NA	0	no	0	no	0	no	0	NA
7	G7	June	LKWS	Bachelor	0.387	4	0	yes	10.3359	no	0	yes	7.75194	yes	2.58398	no	0	no	0	no	0	no	0	no	0	no	0	no	0	no	0	2
8	G8	June	LKWS	Harem	2	5	>0.3	no	0	no	0	no	0	no	0	no	0	no	0	no	0	no	0	no	0	no	0	no	0	no	0	0
9	G8	June	LKWS	Harem	2	5	>0.3	no	0	no	0	no	0	no	0	no	0	no	0	no	0	no	0	no	0	no	0	no	0	no	0	0
10	G8	June	LKWS	Harem	2	5	>0.3	yes	1	no	0	yes	1	no	0	no	0	yes	0.5	yes	0.5	no	0	no	0	yes	0.5	no	0	no	0	3
11	G8	June	LKWS	Harem	2	5	>0.3	yes	0.5	no	0	yes	0.5	no	0	no	0	no	0	no	0	no	0	no	0	no	0	no	0	no	0	1
12	G8	June	LKWS	Harem	1.909	5	>0.3	yes	0.523834	no	0	yes	0.523834	no	0	no	0	no	0	no	0	no	0	no	0	no	0	no	0	no	0	1
13	G8	June	LKWS	Harem	1.841	5	>0.3	yes	0.543183	no	0	yes	0.543183	no	0	no	0	yes	0.543183	NA	NA	NA	NA	NA	0	no	0	no	0	no	0	NA
14	G8	June	LKWS	Harem	1.542	5	>0.3	yes	19.4553	no	0	yes	18.8067	yes	0.648508	no	0	no	0	no	0	no	0	no	0	yes	0.648508	no	0	yes	1.29702	4
15	G8	June	LKWS	Harem	2	5	>0.3	yes	32.5	no	0	yes	32.5	no	0	no	0	yes	2	yes	1	yes	1	no	0	yes	3	no	0	no	0	4
16	G8	June	LKWS	Harem	1.42	5	>0.3	yes	1.40845	no	0	yes	1.40845	no	0	no	0	no	0	no	0	no	0	no	0	yes	0.704225	no	0	no	0	2
17	G8	June	LKWS	Harem	1.263	5	>0.3	no	0	no	0	no	0	no	0	no	0	no	0	no	0	no	0	no	0	no	0	no	0	no	0	0
18	G8	June	LKWS	Harem	1.43	5	>0.3	yes	6.99301	no	0	yes	6.99301	no	0	no	0	yes	1.3986	yes	1.3986	no	0	no	0	yes	1.3986	no	0	no	0	3
19	G8	June	LKWS	Harem	1.075	5	>0.3	yes	58.6047	no	0	yes	56.7442	yes	1.86047	no	0	yes	1.86047	yes	1.86047	no	0	no	0	yes	1.86047	no	0	yes	1.86047	5
20	G8	June	LKWS	Harem	1.16	5	>0.3	yes	10.3448	no	0	yes	10.3448	no	0	no	0	no	0	no	0	no	0	no	0	no	0	no	0	no	0	1
21	G8	June	LKWS	Harem	0.953	5	>0.3	yes	13.6411	yes	2.09864	yes	9.44386	yes	2.09864	no	0	yes	2.09864	yes	1.04932	yes	1.04932	no	0	no	0	no	0	no	0	4
22	G8	June	LKWS	Harem	1.033	5	>0.3	yes	1.93611	no	0	yes	1.93611	no	0	no	0	no	0	no	0	no	0	no	0	yes	2.90416	no	0	yes	0.968054	3
23	G8	June	LKWS	Harem	0.726	5	>0.3	yes	8.26446	no	0	yes	8.26446	no	0	no	0	yes	1.37741	NA	NA	NA	NA	NA	0	no	0	no	0	no	0	NA
24	G8	June	LKWS	Harem	0.571	5	>0.3	yes	21.0158	no	0	yes	21.0158	no	0	no	0	no	0	no	0	no	0	no	0	no	0	no	0	no	0	1
25	G8	June	LKWS	Harem	1.202	5	>0.3	yes	3.32779	no	0	yes	3.32779	no	0	no	0	no	0	no	0	no	0	no	0	yes	1.66389	no	0	no	0	2
26	G8	June	LKWS	Harem	0.606	5	>0.3	yes	9.90099	yes	6.60066	yes	3.30033	no	0	no	0	yes	4.9505	yes	4.9505	no	0	no	0	no	0	yes	1.65017	no	0	4
27	G8	June	LKWS	Harem	1.232	5	>0.3	yes	5.68182	no	0	yes	5.68182	no	0	no	0	no	0	no	0	no	0	no	0	no	0	no	0	no	0	1
28	G8	June	LKWS	Harem	0.162	5	>0.3	yes	24.6914	no	0	yes	24.6914	no	0	no	0	yes	6.17284	no	0	no	0	yes	0	no	0	no	0	no	0	2
29	G8	June	LKWS	Harem	0.166	5	>0.3	yes	12.0482	no	0	yes	12.0482	no	0	no	0	no	0	no	0	no	0	no	0	no	0	no	0	no	0	1
30	G8	June	LKWS	Harem	0.105	5	>0.3	yes	28.5714	no	0	yes	28.5714	no	0	no	0	no	0	no	0	no	0	no	0	no	0	no	0	no	0	1
31	G8	June	LKWS	Harem	0.155	5	>0.3	yes	64.5161	yes	6.45161	yes	58.0645	no	0	no	0	no	0	no	0	no	0	no	0	no	0	no	0	yes	12.9032	3
32	G8	June	LKWS	Harem	0.109	5	>0.3	yes	128.44	no	0	yes	128.44	no	0	no	0	no	0	no	0	no	0	no	0	no	0	no	0	no	0	1
51	G15	June	LKWS	Harem	2	8	>0.3	yes	0.5	no	0	yes	0.5	no	0	no	0	no	0	no	0	no	0	no	0	no	0	no	0	no	0	1
52	G15	June	LKWS	Harem	2	8	>0.3	yes	46.5	no	0	yes	46.5	no	0	no	0	yes	3	yes	2	yes	1	no	0	yes	0.5	no	0	yes	0.5	5
53	G15	June	LKWS	Harem	1.028	8	>0.3	no	0	no	0	no	0	no	0	no	0	no	0	no	0	no	0	no	0	no	0	no	0	yes	2.91829	1
54	G15	June	LKWS	Harem	0.917	8	>0.3	yes	242.094	no	0	yes	242.094	no	0	no	0	yes	27.2628	yes	14.1767	yes	13.0862	no	0	yes	1.1	no	0	yes	1.09051	5
55	G15	June	LKWS	Harem	0.753	8	>0.3	yes	120.85	no	0	yes	118.194	yes	2.65604	no	0	yes	3.98406	yes	1.32802	yes	2.65604	no	0	yes	1.3	no	0	no	0	5
56	G15	June	LKWS	Harem	0.93	8	>0.3	yes	45.1613	no	0	yes	44.086	yes	1.07527	no	0	yes	6.45161	yes	3.22581	yes	3.22581	no	0	yes	1.1	no	0	no	0	5
57	G15	June	LKWS	Harem	0.491	8	>0.3	yes	423.625	yes	2.03666	yes	421.589	no	0	no	0	yes	16.3	yes	12.22	yes	4.07332	no	0	no	0	no	0	no	0	4
58	G15	June	LKWS	Harem	0.549	8	>0.3	yes	145.719	no	0	yes	145.719	no	0	no	0	yes	1.82149	yes	1.82149	no	0	no	0	no	0	no	0	no	0	2
59	G15	June	LKWS	Harem	0.655	8	>0.3	yes	108.397	no	0	yes	108.397	no	0	no	0	yes	7.63359	yes	3.05344	yes	4.58015	no	0	no	0	no	0	no	0	3
61	G15	June	LKWS	Harem	0.611	8	>0.3	yes	135.843	no	0	yes	127.66	yes	8.18331	no	0	yes	8.18331	yes	8.18331	no	0	no	0	no	0	no	0	yes	1.63666	4
63	G15	June	LKWS	Harem	0.392	8	>0.3	yes	12.7551	yes	2.55102	yes	5.10204	yes	5.10204	no	0	no	0	no	0	no	0	no	0	no	0	no	0	no	0	2
65	G15	June	LKWS	Harem	0.343	8	>0.3	yes	209.913	no	0	yes	204.082	yes	5.8309	no	0	yes	14.5773	yes	5.8309	yes	2.91545	no	0	no	0	no	0	no	0	4
67	G15	June	LKWS	Harem	0.372	8	>0.3	yes	231.183	no	0	yes	231.183	no	0	no	0	yes	18.8172	yes	16.129	no	0	yes	0	no	0	no	0	no	0	3
69	G15	June	LKWS	Harem	0.191	8	>0.3	yes	115.183	no	0	yes	115.183	no	0	no	0	no	0	no	0	no	0	no	0	yes	5.2356	no	0	no	0	2
70	G16	June	LKWS	NA	2	7	>0.3	no	0	no	0	no	0	no	0	no	0	no	0	no	0	no	0	no	0	yes	1	no	0	no	0	1
71	G16	June	LKWS	NA	2	7	>0.3	no	0	no	0	no	0	no	0	no	0	no	0	no	0	no	0	no	0	yes	1	no	0	no	0	1
72	G16	June	LKWS	NA	2	7	>0.3	yes	22	no	0	yes	22	no	0	no	0	no	0	no	0	no	0	no	0	yes	4	no	0	yes	0.5	3
73	G16	June	LKWS	NA	2	7	>0.3	no	0	no	0	no	0	no	0	no	0	no	0	no	0	no	0	no	0	no	0	no	0	no	0	0
74	G16	June	LKWS	NA	2	7	>0.3	no	0	no	0	no	0	no	0	no	0	no	0	no	0	no	0	no	0	no	0	yes	1	no	0	1
75	G16	June	LKWS	NA	2	7	>0.3	yes	9	no	0	yes	9	no	0	no	0	no	0	no	0	no	0	no	0	yes	1	no	0	no	0	2
76	G16	June	LKWS	NA	2	7	>0.3	yes	14	no	0	yes	14	no	0	no	0	yes	1	yes	16.129	no	0	yes	0	no	0	no	0	no	0	3
77	G16	June	LKWS	NA	2	7	>0.3	no	0	no	0	no	0	no	0	no	0	no	0	no	0	no	0	no	0	no	0	no	0	no	0	0
78	G16	June	LKWS	NA	2	7	>0.3	yes	5	no	0	yes	5	no	0	no	0	no	0	no	0	no	0	no	0	no	0	no	0	yes	0.5	2
79	G16	June	LKWS	NA	1.97	7	>0.3	yes	10.1523	no	0	yes	10.1523	no	0	no	0	yes	1.52284	yes	1.52284	no	0	no	0	yes	0.507614	yes	3.5533	no	0	4
80	G16	June	LKWS	NA	1.258	7	>0.3	yes	7.94913	no	0	yes	7.94913	no	0	no	0	yes	0.794913	yes	0.794913	no	0	no	0	no	0	no	0	no	0	2
81	G16	June	LKWS	NA	0.983	7	>0.3	yes	65.1068	no	0	yes	65.1068	no	0	no	0	yes	3.05188	yes	3.05188	no	0	no	0	yes	8.13835	no	0	no	0	3
82	G16	June	LKWS	NA	1.058	7	>0.3	no	0	no	0	no	0	no	0	no	0	no	0	no	0	no	0	no	0	no	0	no	0	no	0	0
83	G16	June	LKWS	NA	0.427	7	>0.3	yes	395.785	yes	2.34192	yes	393.443	no	0	no	0	yes	4.68384	yes	4.68384	no	0	no	0	yes	14.0515	no	0	yes	2.34192	5
84	G16	June	LKWS	NA	0.34	7	>0.3	yes	414.706	yes	11.7647	yes	402.941	no	0	no	0	yes	8.82353	yes	5.88235	no	0	no	0	yes	5.88235	no	0	no	0	4
85	G16	June	LKWS	NA	0.68	7	>0.3	yes	113.235	no	0	yes	113.235	no	0	no	0	yes	10.2941	yes	8.82353	yes	1.47059	no	0	yes	2.94118	no	0	no	0	4
86	G16	June	LKWS	NA	0.269	7	>0.3	yes	293.68	yes	14.8699	yes	278.81	no	0	no	0	yes	3.71747	yes	3.71747	no	0	no	0	no	0	no	0	no	0	3
87	G16	June	LKWS	NA	0.267	7	>0.3	yes	284.644	no	0	yes	284.644	no	0	no	0	no	0	no	0	no	0	no	0	yes	3.74532	no	0	no	0	2
88	G16	June	LKWS	NA	0.186	7	>0.3	yes	96.7742	no	0	yes	96.7742	no	0	no	0	yes	10.7527	yes	5.37634	no	0	no	0	no	0	no	0	no	0	2
89	G16	June	LKWS	NA	0.233	7	>0.3	yes	849.785	no	0	yes	849.785	no	0	no	0	no	0	no	0	no	0	no	0	no	0	no	0	no	0	1
91	G16	June	LKWS	NA	0.269	7	>0.3	yes	832.714	yes	33.4572	yes	799.257	no	0	no	0	yes	22.3048	yes	14.8699	yes	7.43494	no	0	no	0	no	0	no	0	4
92	G17	June	LKWS	Harem	2	NA	NA	yes	30	no	0	yes	30	no	0	no	0	yes	3	yes	1	no	0	no	0	no	0	no	0	no	0	2
93	G17	June	LKWS	Harem	2	NA	NA	yes	25	no	0	yes	24	yes	1	no	0	yes	3	yes	0.5	yes	0.5	no	0	yes	1	no	0	yes	0.5	6
94	G17	June	LKWS	Harem	2	NA	NA	yes	25	no	0	yes	24	yes	1	no	0	yes	4	yes	3	no	0	no	0	yes	1	no	0	no	0	4
95	G17	June	LKWS	Harem	2	NA	NA	yes	22	no	0	yes	22	no	0	no	0	yes	0.5	NA	NA	NA	NA	NA	0	no	0	no	0	no	0	NA
96	G17	June	LKWS	Harem	2	NA	NA	yes	15	no	0	yes	15	no	0	no	0	yes	3	yes	2	no	0	no	0	yes	1	no	0	no	0	3
97	G17	June	LKWS	Harem	1.777	NA	NA	yes	274.62	no	0	yes	274.62	no	0	no	0	yes	10.6922	yes	6.75295	yes	0.562746	no	0	yes	0.562746	no	0	yes	1.12549	5
98	G17	June	LKWS	Harem	1.876	NA	NA	yes	88.4861	no	0	yes	88.4861	no	0	no	0	yes	2.66525	yes	2.1322	no	0	no	0	no	0	no	0	yes	0.533049	3
99	G17	June	LKWS	Harem	0.867	NA	NA	yes	47.2895	no	0	yes	46.1361	yes	1.1534	no	0	yes	1.1534	no	0	yes	1.1534	no	0	no	0	no	0	no	0	3
100	G17	June	LKWS	Harem	1.184	NA	NA	yes	96.2838	no	0	yes	94.5946	yes	1.68919	no	0	yes	5.91216	yes	3.37838	yes	2.53378	no	0	no	0	no	0	no	0	4
101	G17	June	LKWS	Harem	1.831	NA	NA	yes	12.0153	no	0	yes	12.0153	no	0	no	0	yes	2.73075	yes	1.0923	no	0	no	0	no	0	no	0	yes	0.54615	3
102	G17	June	LKWS	Harem	1.666	NA	NA	yes	9.0036	no	0	yes	9.0036	no	0	no	0	yes	0.60024	yes	0.60024	no	0	no	0	no	0	no	0	yes	0.60024	3
103	G17	June	LKWS	Harem	0.78	NA	NA	yes	52.5641	no	0	yes	52.5641	no	0	no	0	yes	8.97436	yes	7.69231	no	0	no	0	no	0	no	0	yes	3.84615	3
104	G17	June	LKWS	Harem	1.496	NA	NA	yes	1.3369	no	0	yes	1.3369	no	0	no	0	yes	0.668449	yes	0.668449	no	0	no	0	no	0	no	0	yes	0.668449	3
105	G17	June	LKWS	Harem	1.293	NA	NA	yes	10.8275	no	0	yes	10.8275	no	0	no	0	yes	1.54679	yes	1.54679	no	0	no	0	no	0	no	0	no	0	2
106	G17	June	LKWS	Harem	0.837	NA	NA	yes	5.97372	no	0	yes	5.97372	no	0	no	0	yes	1.19474	NA	NA	NA	NA	NA	0	no	0	no	0	yes	1.19474	NA
107	G17	June	LKWS	Harem	0.557	NA	NA	yes	1.79533	no	0	yes	1.79533	no	0	no	0	yes	1.79533	no	0	yes	1.79533	no	0	no	0	no	0	no	0	2
108	G17	June	LKWS	Harem	1.045	NA	NA	yes	49.7608	no	0	yes	49.7608	no	0	no	0	yes	8.61244	yes	7.6555	yes	0.956938	no	0	yes	5.74163	no	0	no	0	4
109	G17	June	LKWS	Harem	0.365	NA	NA	yes	63.0137	no	0	yes	63.0137	no	0	no	0	yes	5.47945	yes	2.73973	no	0	no	0	no	0	no	0	no	0	2
110	G17	June	LKWS	Harem	0.473	NA	NA	yes	97.2516	no	0	yes	97.2516	no	0	no	0	yes	6.34249	yes	4.22833	yes	2.11416	no	0	no	0	no	0	no	0	3
111	G17	June	LKWS	Harem	0.639	NA	NA	yes	164.319	no	0	yes	164.319	no	0	no	0	yes	14.0845	yes	10.9546	yes	1.56495	no	0	no	0	no	0	yes	3.12989	4
112	G17	June	LKWS	Harem	0.609	NA	NA	yes	13.1363	no	0	yes	13.1363	no	0	no	0	no	0	no	0	no	0	no	0	yes	1.64204	no	0	yes	3.28407	3
113	G17	June	LKWS	Harem	0.422	NA	NA	yes	146.919	no	0	yes	144.55	yes	2.36967	no	0	yes	14.218	yes	11.8483	no	0	no	0	no	0	no	0	no	0	3
114	G17	June	LKWS	Harem	0.523	NA	NA	yes	137.667	no	0	yes	135.755	yes	1.91205	no	0	yes	22.9446	yes	3.82409	yes	1.91205	yes	0	no	0	no	0	yes	1.91205	6
115	G17	June	LKWS	Harem	0.402	NA	NA	yes	84.5771	no	0	yes	84.5771	no	0	no	0	yes	2.48756	yes	2.48756	no	0	no	0	no	0	no	0	no	0	2
116	G17	June	LKWS	Harem	0.345	NA	NA	yes	136.232	no	0	yes	136.232	no	0	no	0	no	0	no	0	no	0	no	0	no	0	no	0	no	0	1
117	G17	June	LKWS	Harem	0.589	NA	NA	yes	54.3294	no	0	yes	49.236	yes	5.09338	no	0	yes	3.39559	yes	1.69779	yes	1.69779	no	0	no	0	no	0	no	0	4
118	G17	June	LKWS	Harem	0.322	NA	NA	yes	9.31677	yes	3.10559	yes	6.21118	no	0	no	0	yes	3.1	NA	NA	NA	NA	NA	0	no	0	no	0	no	0	NA
119	G17	June	LKWS	Harem	0.433	NA	NA	yes	138.568	no	0	yes	138.568	no	0	no	0	yes	11.5473	yes	6.92841	no	0	yes	0	no	0	no	0	no	0	3
120	G17	June	LKWS	Harem	0.46	NA	NA	yes	163.043	no	0	yes	163.043	no	0	no	0	no	0	no	0	no	0	no	0	no	0	no	0	no	0	1
121	G17	June	LKWS	Harem	0.279	NA	NA	yes	652.33	no	0	yes	652.33	no	0	no	0	yes	14.3369	yes	14.3369	no	0	no	0	no	0	no	0	no	0	2
123	G17	June	LKWS	Harem	0.45	NA	NA	yes	46.6667	no	0	yes	46.6667	no	0	no	0	no	0	no	0	no	0	no	0	no	0	no	0	no	0	1
124	G17	June	LKWS	Harem	0.27	NA	NA	yes	262.963	no	0	yes	262.963	no	0	no	0	yes	25.9259	yes	3.7037	yes	3.7037	no	0	no	0	no	0	no	0	3
125	G17	June	LKWS	Harem	0.675	NA	NA	yes	34.0741	no	0	yes	34.0741	no	0	no	0	no	0	no	0	no	0	no	0	no	0	no	0	no	0	1
126	G17	June	LKWS	Harem	0.633	NA	NA	yes	148.499	no	0	yes	146.919	yes	1.57978	no	0	yes	23.69	yes	15.7978	yes	1.57978	no	0	yes	1.57978	no	0	yes	3.15956	6
127	G17	June	LKWS	Harem	0.147	NA	NA	yes	163.265	no	0	yes	156.463	yes	6.80272	no	0	yes	34.0136	yes	34.0136	no	0	no	0	no	0	no	0	no	0	3
129	G17	June	LKWS	Harem	0.236	NA	NA	yes	29.661	no	0	yes	29.661	no	0	no	0	yes	4.23729	yes	4.23729	no	0	no	0	no	0	no	0	no	0	2
131	G17	June	LKWS	Harem	0.275	NA	NA	yes	101.818	no	0	yes	101.818	no	0	no	0	yes	3.63636	yes	3.63636	no	0	no	0	no	0	no	0	no	0	2
132	G18	June	LKWS	Harem	2	8	<0.3	no	0	no	0	no	0	no	0	no	0	no	0	no	0	no	0	no	0	yes	0.5	no	0	no	0	1
133	G18	June	LKWS	Harem	2	8	<0.3	yes	31	no	0	yes	31	no	0	no	0	yes	3	yes	3	no	0	no	0	yes	1	no	0	yes	0.5	4
134	G18	June	LKWS	Harem	2	8	<0.3	yes	2	no	0	yes	1	yes	0.5	yes	0.5	yes	0.5	no	0	yes	0.5	no	0	no	0	no	0	no	0	4
135	G18	June	LKWS	Harem	2	8	<0.3	yes	1	no	0	yes	1	no	0	no	0	yes	1	yes	1	no	0	no	0	no	0	no	0	no	0	2
136	G18	June	LKWS	Harem	2	8	<0.3	no	0	no	0	no	0	no	0	no	0	no	0	no	0	no	0	no	0	yes	0.5	no	0	no	0	1
137	G18	June	LKWS	Harem	1.067	8	<0.3	yes	10.3093	no	0	yes	10.3093	no	0	no	0	no	0	no	0	no	0	no	0	yes	0.9	no	0	no	0	2
138	G18	June	LKWS	Harem	0.75	8	<0.3	yes	20	yes	1.33333	yes	4	yes	14.6667	no	0	yes	5.33333	yes	1.33333	yes	1.33333	no	0	yes	1.3	no	0	no	0	5
139	G18	June	LKWS	Harem	0.828	8	<0.3	no	0	no	0	no	0	no	0	no	0	no	0	no	0	no	0	no	0	yes	1.2	no	0	no	0	1
140	G18	June	LKWS	Harem	0.957	8	<0.3	yes	25.0784	yes	1.04493	yes	19.8537	yes	4.17973	no	0	yes	7.31452	yes	3.1348	yes	1.04493	no	0	yes	5.2	no	0	yes	3.1348	6
141	G18	June	LKWS	Harem	0.437	8	<0.3	yes	18.3066	no	0	yes	6.86499	yes	11.4416	no	0	yes	9.15332	yes	4.57666	no	0	no	0	no	0	no	0	no	0	3
142	G18	June	LKWS	Harem	0.788	8	<0.3	yes	73.6041	no	0	yes	71.066	yes	2.53807	no	0	yes	6.34518	yes	1.26904	no	0	no	0	yes	1.3	no	0	yes	2.53807	5
143	G18	June	LKWS	Harem	0.236	8	<0.3	yes	NA	NA	NA	NA	NA	NA	NA	NA	NA	no	0	no	0	no	0	no	0	yes	4.23729	no	0	no	0	NA
144	G18	June	LKWS	Harem	0.558	8	<0.3	yes	19.7133	no	0	yes	19.7133	no	0	no	0	yes	5.37634	yes	5.37634	no	0	no	0	no	0	no	0	no	0	2
145	G18	June	LKWS	Harem	0.532	8	<0.3	yes	75.188	yes	1.8797	yes	73.3083	no	0	no	0	yes	13.16	yes	5.6391	yes	3.7594	no	0	yes	1.8797	no	0	no	0	5
146	G18	June	LKWS	Harem	0.466	8	<0.3	yes	15.0215	no	0	yes	6.43777	yes	8.58369	no	0	yes	4.29185	no	0	yes	2.14592	no	0	no	0	no	0	no	0	3
147	G18	June	LKWS	Harem	0.351	8	<0.3	yes	8.54701	no	0	yes	5.69801	yes	2.849	no	0	no	0	no	0	no	0	no	0	no	0	no	0	no	0	2
148	G18	June	LKWS	Harem	0.306	8	<0.3	yes	9.80392	no	0	yes	9.80392	no	0	no	0	no	0	no	0	no	0	no	0	no	0	no	0	no	0	1
149	G18	June	LKWS	Harem	0.334	8	<0.3	yes	5.98802	no	0	yes	2.99401	yes	2.99401	no	0	no	0	no	0	no	0	no	0	no	0	no	0	no	0	2
151	G18	June	LKWS	Harem	1.211	8	<0.3	yes	NA	NA	NA	NA	NA	NA	NA	NA	NA	yes	9.0834	yes	2.47729	yes	1.65153	no	0	yes	0.8	no	0	no	0	NA
152	G18	June	LKWS	Harem	0.655	8	<0.3	no	0	no	0	no	0	no	0	no	0	no	0	no	0	no	0	no	0	no	0	no	0	no	0	0
153	G18	June	LKWS	Harem	0.419	8	<0.3	yes	9.54654	no	0	yes	7.1599	yes	2.38663	no	0	no	0	no	0	no	0	no	0	yes	2.38663	no	0	no	0	3
154	G18	June	LKWS	Harem	0.575	8	<0.3	yes	189.565	no	0	yes	184.348	yes	5.21739	no	0	yes	1.73913	yes	1.73913	no	0	no	0	yes	1.73913	no	0	no	0	4
155	G18	June	LKWS	Harem	0.316	8	<0.3	yes	47.4684	yes	12.6582	yes	34.8101	no	0	no	0	yes	6.32911	yes	6.32911	no	0	no	0	no	0	no	0	no	0	3
156	G18	June	LKWS	Harem	0.28	8	<0.3	yes	89.2857	no	0	yes	53.5714	yes	35.7143	no	0	yes	3.57143	yes	3.57143	no	0	no	0	yes	3.57143	no	0	no	0	4
158	G18	June	LKWS	Harem	0.323	8	<0.3	yes	61.9195	no	0	yes	58.8235	yes	3.09598	no	0	yes	6.19195	yes	3.09598	yes	3.09598	no	0	no	0	no	0	no	0	4
159	G18	June	LKWS	Harem	0.221	8	<0.3	yes	348.416	no	0	yes	348.416	no	0	no	0	yes	4.52489	yes	4.52489	no	0	no	0	no	0	no	0	no	0	2
160	G18	June	LKWS	Harem	0.328	8	<0.3	yes	3.04878	no	0	yes	3.04878	no	0	no	0	yes	6.09756	yes	3.04878	no	0	yes	0	no	0	no	0	no	0	3
161	G18	June	LKWS	Harem	0.537	8	<0.3	yes	288.641	no	0	yes	284.916	yes	3.72439	no	0	no	0	no	0	no	0	no	0	yes	3.72439	no	0	no	0	3
162	G18	June	LKWS	Harem	0.614	8	<0.3	no	0	no	0	no	0	no	0	no	0	no	0	no	0	no	0	no	0	no	0	no	0	no	0	0
163	G18	June	LKWS	Harem	0.584	8	<0.3	yes	1.71233	no	0	yes	1.71233	no	0	no	0	no	0	no	0	no	0	no	0	no	0	no	0	no	0	1
165	G18	June	LKWS	Harem	0.576	8	<0.3	yes	48.6111	no	0	yes	48.6111	no	0	no	0	yes	3.47222	yes	3.47222	no	0	no	0	no	0	no	0	no	0	2
167	G18	June	LKWS	Harem	0.396	8	<0.3	yes	32.8283	no	0	yes	12.6263	yes	20.202	no	0	yes	2.52525	yes	2.52525	no	0	no	0	no	0	no	0	no	0	3
168	G18	June	LKWS	Harem	0.488	8	<0.3	yes	102.459	no	0	yes	100.41	yes	2.04918	no	0	no	0	no	0	no	0	no	0	yes	8.19672	no	0	no	0	3
170	G18	June	LKWS	Harem	0.555	8	<0.3	no	0	no	0	no	0	no	0	no	0	no	0	no	0	no	0	no	0	no	0	no	0	no	0	0
171	G21	June	LKWS	Harem	2	11	>0.3	yes	9	no	0	yes	9	no	0	no	0	yes	1	NA	NA	NA	NA	NA	0	no	0	no	0	no	0	NA
172	G21	June	LKWS	Harem	2	11	>0.3	no	0	no	0	no	0	no	0	no	0	no	0	no	0	no	0	no	0	no	0	yes	1	no	0	1
173	G21	June	LKWS	Harem	2	11	>0.3	yes	7	yes	1	yes	6	no	0	no	0	no	0	no	0	no	0	no	0	no	0	no	0	no	0	2
174	G21	June	LKWS	Harem	2	11	>0.3	no	0	no	0	no	0	no	0	no	0	yes	1	yes	1	no	0	no	0	no	0	no	0	no	0	1
175	G21	June	LKWS	Harem	2	11	>0.3	yes	1	no	0	yes	1	no	0	no	0	yes	4	yes	3	yes	1	no	0	no	0	no	0	no	0	3
176	G21	June	LKWS	Harem	2	11	>0.3	no	0	no	0	no	0	no	0	no	0	yes	18	yes	14	no	0	no	0	no	0	no	0	no	0	1
177	G21	June	LKWS	Harem	2	11	>0.3	yes	24	no	0	yes	24	no	0	no	0	yes	1	yes	1	no	0	no	0	no	0	no	0	no	0	2
178	G21	June	LKWS	Harem	2	11	>0.3	yes	4	no	0	yes	4	no	0	no	0	no	0	no	0	no	0	no	0	no	0	no	0	no	0	1
179	G21	June	LKWS	Harem	2	11	>0.3	yes	2	no	0	yes	2	no	0	no	0	yes	1	yes	1	no	0	no	0	no	0	no	0	no	0	2
180	G21	June	LKWS	Harem	2	11	>0.3	yes	12	no	0	yes	11	yes	1	no	0	no	0	no	0	no	0	no	0	no	0	no	0	no	0	2
182	G21	June	LKWS	Harem	2	11	>0.3	yes	1	no	0	yes	1	no	0	no	0	yes	1	yes	1	no	0	no	0	yes	1	no	0	no	0	3
183	G21	June	LKWS	Harem	1.254	11	>0.3	yes	4.78469	no	0	yes	1.5949	yes	3.18979	no	0	no	0	no	0	no	0	no	0	no	0	no	0	no	0	2
184	G21	June	LKWS	Harem	2	11	>0.3	yes	5	no	0	yes	5	no	0	no	0	yes	1	yes	1	no	0	no	0	no	0	no	0	no	0	2
185	G21	June	LKWS	Harem	1.436	11	>0.3	yes	0.696379	no	0	yes	0.696379	no	0	no	0	yes	22.9805	yes	14.624	yes	7.66017	no	0	no	0	no	0	no	0	3
186	G21	June	LKWS	Harem	2	11	>0.3	yes	2	no	0	yes	2	no	0	no	0	no	0	no	0	no	0	no	0	no	0	yes	1	no	0	2
187	G21	June	LKWS	Harem	2	11	>0.3	yes	2	no	0	yes	2	no	0	no	0	yes	0.5	NA	NA	NA	NA	NA	0	no	0	no	0	no	0	NA
188	G21	June	LKWS	Harem	1.954	11	>0.3	yes	1.02354	no	0	yes	1.02354	no	0	no	0	yes	1.02354	yes	1.02354	no	0	no	0	yes	0.511771	no	0	no	0	3
189	G21	June	LKWS	Harem	1.793	11	>0.3	no	0	no	0	no	0	no	0	no	0	no	0	no	0	no	0	no	0	no	0	no	0	no	0	0
190	G21	June	LKWS	Harem	0.802	11	>0.3	yes	46.1347	no	0	yes	44.8878	yes	1.24688	no	0	yes	1.24688	NA	NA	NA	NA	NA	0	no	0	no	0	no	0	NA
191	G21	June	LKWS	Harem	1.676	11	>0.3	yes	13.1265	no	0	yes	13.1265	no	0	no	0	no	0	no	0	no	0	no	0	yes	1.19332	no	0	no	0	2
192	G21	June	LKWS	Harem	1.314	11	>0.3	yes	2.28311	no	0	yes	2.28311	no	0	no	0	no	0	no	0	no	0	no	0	no	0	no	0	no	0	1
193	G21	June	LKWS	Harem	1.498	11	>0.3	yes	1.33511	no	0	yes	0.667557	yes	0.667557	no	0	yes	0.667557	yes	0.667557	no	0	no	0	no	0	no	0	yes	0.667557	4
194	G21	June	LKWS	Harem	2	11	>0.3	yes	28	no	0	yes	28	no	0	no	0	yes	1	no	0	yes	1	no	0	no	0	no	0	no	0	2
195	G21	June	LKWS	Harem	1.316	11	>0.3	yes	1.51976	yes	0.759878	yes	0.759878	no	0	no	0	yes	1.51976	yes	0.759878	yes	0.759878	no	0	no	0	no	0	no	0	4
196	G21	June	LKWS	Harem	2	11	>0.3	yes	3	no	0	yes	2	yes	1	no	0	no	0	no	0	no	0	no	0	no	0	no	0	no	0	2
197	G21	June	LKWS	Harem	2	11	>0.3	yes	16	no	0	yes	16	no	0	no	0	yes	1	yes	0	no	0	no	0	no	0	no	0	yes	0.5	3
198	G21	June	LKWS	Harem	0.772	11	>0.3	yes	19.4301	yes	1.29534	yes	15.544	yes	2.59067	no	0	no	0	no	0	no	0	no	0	yes	1.29534	no	0	no	0	3
199	G21	June	LKWS	Harem	0.853	11	>0.3	yes	80.891	yes	1.17233	yes	78.5463	yes	1.17233	no	0	yes	5.86166	yes	4.68933	no	0	no	0	no	0	no	0	no	0	3
200	G21	June	LKWS	Harem	1.553	11	>0.3	yes	1.28783	no	0	yes	0.643915	yes	0.643915	no	0	no	0	no	0	no	0	no	0	no	0	no	0	no	0	2
201	G21	June	LKWS	Harem	1.723	11	>0.3	no	0	no	0	no	0	no	0	no	0	yes	1.16077	yes	1.16077	no	0	no	0	no	0	yes	4.06268	no	0	2
202	G21	June	LKWS	Harem	0.886	11	>0.3	yes	7.90068	no	0	yes	7.90068	no	0	no	0	yes	1.12867	no	0	yes	1.12867	no	0	no	0	no	0	no	0	2
203	G21	June	LKWS	Harem	1.605	11	>0.3	yes	1.24611	no	0	yes	1.24611	no	0	no	0	no	0	no	0	no	0	no	0	yes	1.24611	no	0	yes	0.623053	3
204	G21	June	LKWS	Harem	0.492	11	>0.3	yes	16.2602	no	0	yes	16.2602	no	0	no	0	no	0	no	0	no	0	no	0	no	0	no	0	no	0	1
205	G21	June	LKWS	Harem	0.865	11	>0.3	yes	1.15607	no	0	yes	1.15607	no	0	no	0	yes	1.15607	NA	NA	NA	NA	NA	0	no	0	no	0	no	0	NA
206	G21	June	LKWS	Harem	0.704	11	>0.3	yes	11.3636	no	0	yes	9.94318	yes	1.42045	no	0	yes	38.3523	yes	14.2045	yes	9.94318	no	0	yes	1.42045	no	0	yes	1.42045	6
207	G21	June	LKWS	Harem	0.963	11	>0.3	yes	41.5369	yes	2.07684	yes	39.46	no	0	no	0	no	0	no	0	no	0	no	0	yes	1.03842	no	0	no	0	3
208	G21	June	LKWS	Harem	1.116	11	>0.3	yes	3.58423	no	0	yes	3.58423	no	0	no	0	no	0	no	0	no	0	no	0	no	0	no	0	no	0	1
209	G21	June	LKWS	Harem	1.298	11	>0.3	yes	1.54083	no	0	yes	1.54083	no	0	no	0	yes	0.770416	yes	0.770416	no	0	no	0	no	0	no	0	no	0	2
210	G21	June	LKWS	Harem	0.281	11	>0.3	yes	10.6762	no	0	yes	10.6762	no	0	no	0	no	0	no	0	no	0	no	0	no	0	no	0	no	0	1
211	G21	June	LKWS	Harem	0.372	11	>0.3	yes	29.5699	no	0	yes	29.5699	no	0	no	0	no	0	no	0	no	0	no	0	no	0	no	0	no	0	1
212	G21	June	LKWS	Harem	0.873	11	>0.3	yes	50.4009	no	0	yes	49.2554	yes	1.14548	no	0	no	0	no	0	no	0	no	0	no	0	no	0	no	0	2
213	G21	June	LKWS	Harem	0.724	11	>0.3	yes	13.8122	yes	5.52486	yes	6.90608	yes	1.38122	no	0	yes	2.76243	no	0	yes	1.38122	no	0	no	0	no	0	yes	1.38122	4
214	G21	June	LKWS	Harem	0.935	11	>0.3	yes	115.508	yes	2.13904	yes	109.091	yes	4.27807	no	0	yes	2.13904	NA	NA	NA	NA	NA	0	no	0	no	0	no	0	NA
215	G21	June	LKWS	Harem	0.869	11	>0.3	yes	31.0702	no	0	yes	31.0702	no	0	no	0	yes	3.45224	NA	NA	NA	NA	NA	0	no	0	yes	1.15075	no	0	NA
216	G21	June	LKWS	Harem	0.218	11	>0.3	yes	22.9358	no	0	yes	22.9358	no	0	no	0	no	0	no	0	no	0	no	0	no	0	no	0	no	0	1
217	G21	June	LKWS	Harem	0.526	11	>0.3	yes	51.3308	yes	30.4183	yes	20.9125	no	0	no	0	yes	1.90114	NA	NA	NA	NA	NA	0	no	0	yes	1.90114	no	0	NA
218	G21	June	LKWS	Harem	0.549	11	>0.3	no	0	no	0	no	0	no	0	no	0	no	0	no	0	no	0	no	0	no	0	no	0	no	0	0
220	G21	June	LKWS	Harem	0.836	11	>0.3	yes	33.4928	no	0	yes	33.4928	no	0	no	0	yes	2.39234	yes	1.19617	no	0	no	0	no	0	yes	2.39234	no	0	3
221	G21	June	LKWS	Harem	0.851	11	>0.3	yes	15.2761	yes	5.87544	yes	9.40071	no	0	no	0	no	0	no	0	no	0	no	0	no	0	yes	4.70035	no	0	3
223	G21	June	LKWS	Harem	0.482	11	>0.3	yes	18.6722	no	0	yes	18.6722	no	0	no	0	yes	6.22407	yes	2.07469	no	0	no	0	no	0	no	0	no	0	2
224	G21	June	LKWS	Harem	0.462	11	>0.3	yes	36.7965	no	0	yes	36.7965	no	0	no	0	yes	2.1645	yes	2.1645	no	0	no	0	no	0	no	0	no	0	2
225	G21	June	LKWS	Harem	0.499	11	>0.3	yes	28.0561	no	0	yes	26.0521	yes	2.00401	no	0	yes	2.00401	NA	NA	NA	NA	NA	0	no	0	no	0	no	0	NA
227	G21	June	LKWS	Harem	0.65	11	>0.3	yes	18.4615	yes	1.53846	yes	16.9231	no	0	no	0	yes	1.53846	yes	1.53846	no	0	no	0	no	0	no	0	no	0	3
229	G21	June	LKWS	Harem	0.376	11	>0.3	yes	2.65957	yes	2.65957	no	0	no	0	no	0	yes	7.97872	yes	7.97872	no	0	no	0	no	0	no	0	no	0	2
231	G21	June	LKWS	Harem	0.253	11	>0.3	yes	19.7628	no	0	yes	19.7628	no	0	no	0	no	0	no	0	no	0	no	0	yes	3.95257	yes	7.90514	no	0	3
233	G21	June	LKWS	Harem	0.526	11	>0.3	yes	1.90114	yes	1.90114	no	0	no	0	no	0	no	0	no	0	no	0	no	0	yes	7.60456	no	0	no	0	2
234	G22	June	LKWS	Harem	2	22	>0.3	yes	4	yes	1	no	0	yes	3	no	0	no	0	no	0	no	0	no	0	yes	0.5	yes	2.5	no	0	3
235	G22	June	LKWS	Harem	2	22	>0.3	yes	23	no	0	yes	21	yes	2	no	0	yes	2	yes	2	no	0	no	0	yes	2	no	0	no	0	4
236	G22	June	LKWS	Harem	2	22	>0.3	yes	12	yes	1.5	yes	7	yes	3.5	no	0	no	0	no	0	no	0	no	0	no	0	yes	1	no	0	3
237	G22	June	LKWS	Harem	2	22	>0.3	no	0	no	0	no	0	no	0	no	0	no	0	no	0	no	0	no	0	no	0	no	0	no	0	0
238	G22	June	LKWS	Harem	2	22	>0.3	yes	5.5	yes	0.5	yes	5	no	0	no	0	yes	0.5	no	0	yes	0.5	no	0	no	0	yes	1	no	0	4
239	G22	June	LKWS	Harem	2	22	>0.3	no	0	no	0	no	0	no	0	no	0	no	0	no	0	no	0	no	0	no	0	no	0	no	0	0
240	G22	June	LKWS	Harem	2	22	>0.3	no	0	no	0	no	0	no	0	no	0	no	0	no	0	no	0	no	0	no	0	no	0	no	0	0
241	G22	June	LKWS	Harem	2	22	>0.3	yes	12	yes	2	yes	10	no	0	no	0	yes	1	yes	1	no	0	no	0	no	0	no	0	no	0	3
242	G22	June	LKWS	Harem	2	22	>0.3	no	0	no	0	no	0	no	0	no	0	no	0	no	0	no	0	no	0	no	0	no	0	no	0	0
243	G22	June	LKWS	Harem	2	22	>0.3	yes	8	no	0	yes	7	yes	1	no	0	yes	3	yes	3	no	0	no	0	yes	2	no	0	no	0	4
244	G22	June	LKWS	Harem	2	22	>0.3	yes	19.5	yes	0.5	yes	15.5	yes	3.5	no	0	yes	2	no	0	yes	1	no	0	yes	0.5	no	0	no	0	4
245	G22	June	LKWS	Harem	2	22	>0.3	yes	24	no	0	yes	20	yes	4	no	0	no	0	no	0	no	0	no	0	no	0	no	0	no	0	2
246	G22	June	LKWS	Harem	2	22	>0.3	yes	14	yes	1	yes	11	yes	2	no	0	yes	0.5	NA	NA	NA	NA	NA	0	no	0	no	0	no	0	NA
247	G22	June	LKWS	Harem	2	22	>0.3	yes	8	no	0	yes	5	yes	3	no	0	yes	1	yes	1	no	0	no	0	no	0	no	0	no	0	3
248	G22	June	LKWS	Harem	2	22	>0.3	yes	10	no	0	yes	10	no	0	no	0	no	0	no	0	no	0	no	0	yes	1	no	0	no	0	2
249	G22	June	LKWS	Harem	2	22	>0.3	yes	7	no	0	yes	7	no	0	no	0	yes	1	yes	1	no	0	no	0	no	0	no	0	no	0	2
250	G22	June	LKWS	Harem	2	22	>0.3	yes	13	no	0	yes	10	yes	3	no	0	yes	0.5	NA	NA	NA	NA	NA	0	no	0	no	0	no	0	NA
251	G22	June	LKWS	Harem	2	22	>0.3	yes	2	no	0	yes	2	no	0	no	0	yes	0.5	NA	NA	NA	NA	NA	0	yes	1	no	0	no	0	NA
252	G22	June	LKWS	Harem	2	22	>0.3	yes	2	no	0	yes	2	no	0	no	0	no	0	no	0	no	0	no	0	yes	1	no	0	no	0	2
253	G22	June	LKWS	Harem	2	22	>0.3	no	0	no	0	no	0	no	0	no	0	no	0	no	0	no	0	no	0	no	0	no	0	no	0	0
254	G22	June	LKWS	Harem	2	22	>0.3	yes	19	yes	2	yes	17	no	0	no	0	yes	7.5	yes	5	yes	2	no	0	yes	1	no	0	no	0	5
255	G22	June	LKWS	Harem	2	22	>0.3	yes	24	no	0	yes	23	yes	1	no	0	yes	4	yes	4	no	0	no	0	yes	1	yes	2	yes	0.5	6
256	G22	June	LKWS	Harem	0.865	22	>0.3	yes	80.9249	yes	23.1214	yes	56.6474	yes	1.15607	no	0	yes	3.46821	yes	1.15607	no	0	no	0	no	0	no	0	no	0	3
257	G22	June	LKWS	Harem	0.938	22	>0.3	yes	25.5864	no	0	yes	24.5203	yes	1.0661	no	0	yes	1.0661	yes	1.0661	no	0	no	0	yes	2.1322	no	0	no	0	4
258	G22	June	LKWS	Harem	2	22	>0.3	yes	0.5	no	0	yes	0.5	no	0	no	0	no	0	no	0	no	0	no	0	no	0	no	0	no	0	1
259	G22	June	LKWS	Harem	0.997	22	>0.3	yes	95.2859	no	0	yes	94.2828	yes	1.00301	no	0	no	0	no	0	no	0	no	0	no	0	no	0	no	0	2
260	G22	June	LKWS	Harem	2	22	>0.3	no	0	no	0	no	0	no	0	no	0	no	0	no	0	no	0	no	0	no	0	yes	0.690131	no	0	1
261	G22	June	LKWS	Harem	1.381	22	>0.3	no	0	no	0	no	0	no	0	no	0	no	0	no	0	no	0	no	0	no	0	no	0	yes	0.724113	1
262	G22	June	LKWS	Harem	2	22	>0.3	yes	75	yes	2	yes	73	no	0	no	0	yes	2.42424	yes	1.21212	no	0	yes	0	yes	1.21212	no	0	no	0	5
263	G22	June	LKWS	Harem	0.557	22	>0.3	yes	5.386	no	0	yes	5.386	no	0	no	0	no	0	no	0	no	0	no	0	no	0	no	0	no	0	1
264	G22	June	LKWS	Harem	0.833	22	>0.3	yes	15.6062	yes	1.20048	yes	13.2053	yes	1.20048	no	0	yes	1.20048	yes	1.20048	no	0	no	0	yes	8.40336	no	0	no	0	4
265	G22	June	LKWS	Harem	0.625	22	>0.3	yes	20.8	no	0	yes	20.8	no	0	no	0	yes	1.6	no	0	yes	1.6	no	0	no	0	no	0	no	0	2
266	G22	June	LKWS	Harem	0.744	22	>0.3	yes	8.06452	yes	1.34409	yes	5.37634	yes	1.34409	no	0	yes	2.68817	no	0	yes	1.34409	no	0	no	0	no	0	no	0	3
267	G22	June	LKWS	Harem	2	22	>0.3	yes	15	yes	1	yes	8.5	yes	5.5	no	0	yes	0.860585	yes	0.5	no	0	no	0	yes	2.58176	no	0	no	0	4
268	G22	June	LKWS	Harem	0.623	22	>0.3	yes	253.612	yes	3.21027	yes	248.796	yes	1.60514	no	0	no	0	no	0	no	0	no	0	no	0	no	0	no	0	2
269	G22	June	LKWS	Harem	0.871	22	>0.3	yes	261.768	yes	4.59242	yes	257.176	no	0	no	0	yes	1.14811	NA	NA	NA	NA	NA	0	yes	3.44432	no	0	no	0	NA
270	G22	June	LKWS	Harem	0.648	22	>0.3	yes	29.321	yes	3.08642	yes	23.1481	yes	3.08642	no	0	yes	4.62963	yes	3.08642	no	0	yes	0	yes	1.54321	no	0	no	0	5
271	G22	June	LKWS	Harem	0.773	22	>0.3	yes	29.7542	yes	3.88098	yes	19.4049	yes	6.46831	no	0	yes	1.29366	no	0	no	0	yes	0	yes	2.58732	no	0	no	0	4
273	G22	June	LKWS	Harem	0.947	22	>0.3	yes	53.8543	no	0	yes	51.7423	yes	2.11193	no	0	yes	3.1679	yes	3.1679	no	0	no	0	no	0	no	0	no	0	3
274	G23	June	LKWS	NA	2	9	0	yes	4	yes	2	yes	2	no	0	no	0	no	0	no	0	no	0	no	0	yes	3	no	0	no	0	3
275	G23	June	LKWS	NA	2	9	0	no	0	no	0	no	0	no	0	no	0	no	0	no	0	no	0	no	0	yes	1	yes	1	no	0	2
276	G23	June	LKWS	NA	2	9	0	yes	2	no	0	yes	2	no	0	no	0	yes	1	yes	0.5	no	0	no	0	no	0	no	0	no	0	2
277	G23	June	LKWS	NA	2	9	0	no	0	no	0	no	0	no	0	no	0	no	0	no	0	no	0	no	0	no	0	no	0	no	0	0
278	G23	June	LKWS	NA	1.773	9	0	no	0	no	0	no	0	no	0	no	0	no	0	no	0	no	0	no	0	yes	0.564016	no	0	no	0	1
279	G23	June	LKWS	NA	1.722	9	0	no	0	no	0	no	0	no	0	no	0	no	0	no	0	no	0	no	0	no	0	no	0	no	0	0
280	G23	June	LKWS	NA	2	9	0	no	0	no	0	no	0	no	0	no	0	no	0	no	0	no	0	no	0	yes	1	no	0	no	0	1
281	G23	June	LKWS	NA	2	9	0	no	0	no	0	no	0	no	0	no	0	no	0	no	0	no	0	no	0	no	0	no	0	no	0	0
282	G23	June	LKWS	NA	2	9	0	no	0	no	0	no	0	no	0	no	0	no	0	no	0	no	0	no	0	no	0	no	0	no	0	0
283	G23	June	LKWS	NA	1.787	9	0	yes	4.11111	no	0	yes	20.7051	no	0	no	0	no	0	no	0	no	0	no	0	no	0	no	0	no	0	1
284	G23	June	LKWS	NA	1.302	9	0	no	0	no	0	no	0	no	0	no	0	no	0	no	0	no	0	no	0	no	0	no	0	no	0	0
285	G23	June	LKWS	NA	1.439	9	0	yes	0.694927	no	0	no	0	yes	0.694927	no	0	yes	2.77971	yes	2.77971	no	0	no	0	no	0	no	0	no	0	2
286	G23	June	LKWS	NA	1.938	9	0	yes	3.09598	no	0	yes	3.09598	no	0	no	0	yes	1.03199	yes	1.03199	no	0	no	0	no	0	no	0	no	0	2
287	G23	June	LKWS	NA	2	9	0	yes	5	no	0	yes	5	no	0	no	0	no	0	no	0	no	0	no	0	yes	1	no	0	no	0	2
288	G23	June	LKWS	NA	1.795	9	0	no	0	no	0	no	0	no	0	no	0	no	0	no	0	no	0	no	0	no	0	no	0	no	0	0
289	G23	June	LKWS	NA	1.242	9	0	no	0	no	0	no	0	no	0	no	0	no	0	no	0	no	0	no	0	no	0	no	0	no	0	0
290	G23	June	LKWS	NA	0.697	9	0	yes	5.73888	no	0	yes	2.86944	yes	2.86944	no	0	no	0	no	0	no	0	no	0	no	0	no	0	no	0	2
291	G23	June	LKWS	NA	1.591	9	0	yes	3.14268	no	0	yes	2.51414	no	0	yes	0.628536	yes	1.25707	yes	1.25707	no	0	no	0	yes	0.628536	no	0	no	0	4
292	G23	June	LKWS	NA	1.581	9	0	yes	1.89753	no	0	yes	0.632511	yes	1.26502	no	0	yes	1.26502	yes	0.632511	yes	0.632511	no	0	no	0	no	0	no	0	4
293	G23	June	LKWS	NA	1.108	9	0	yes	4.51264	no	0	yes	1.80505	yes	2.70758	no	0	no	0	no	0	no	0	no	0	no	0	no	0	no	0	2
294	G23	June	LKWS	NA	1	9	0	no	0	no	0	no	0	no	0	no	0	no	0	no	0	no	0	no	0	yes	1	no	0	no	0	1
295	G23	June	LKWS	NA	1.644	9	0	yes	1.21655	no	0	yes	1.21655	no	0	no	0	no	0	no	0	no	0	no	0	no	0	no	0	no	0	1
296	G23	June	LKWS	NA	0.874	9	0	yes	33.1808	no	0	yes	30.8924	yes	2.28833	no	0	yes	4.57666	yes	1.14416	no	0	no	0	no	0	no	0	no	0	3
297	G23	June	LKWS	NA	1.016	9	0	yes	3.93701	no	0	yes	2.95276	yes	0.984252	no	0	yes	0.984252	yes	0.984252	no	0	no	0	yes	3.93701	no	0	no	0	4
298	G23	June	LKWS	NA	1.242	9	0	no	0	no	0	no	0	no	0	no	0	yes	0.805153	yes	0.805153	no	0	no	0	no	0	no	0	yes	0.805153	2
299	G23	June	LKWS	NA	1.63	9	0	yes	0.613497	no	0	yes	0.613497	no	0	no	0	no	0	no	0	no	0	no	0	no	0	no	0	no	0	1
300	G23	June	LKWS	NA	0.862	9	0	yes	1.16009	no	0	yes	1.16009	no	0	no	0	no	0	no	0	no	0	no	0	no	0	no	0	no	0	1
301	G23	June	LKWS	NA	0.769	9	0	yes	7.80234	no	0	yes	7.80234	no	0	no	0	no	0	no	0	no	0	no	0	no	0	no	0	no	0	1
302	G23	June	LKWS	NA	0.828	9	0	yes	20.5314	yes	1.20773	yes	16.9082	yes	2.41546	no	0	no	0	no	0	no	0	no	0	no	0	no	0	no	0	2
304	G23	June	LKWS	NA	0.92	9	0	yes	3.26087	no	0	yes	1.08696	yes	2.17391	no	0	yes	2.17391	yes	2.17391	no	0	no	0	no	0	no	0	no	0	3
305	G23	June	LKWS	NA	1	9	0	yes	1	no	0	yes	1	no	0	no	0	no	0	no	0	no	0	no	0	no	0	no	0	no	0	1
307	G23	June	LKWS	NA	0.755	9	0	yes	2.64901	no	0	yes	2.64901	no	0	no	0	yes	1.3245	yes	1.3245	no	0	no	0	no	0	no	0	no	0	2
309	G23	June	LKWS	NA	1.095	9	0	no	0	no	0	no	0	no	0	no	0	yes	0.913242	yes	0.913242	no	0	no	0	no	0	no	0	no	0	1
311	G23	June	LKWS	NA	0.887	9	0	yes	64.2616	no	0	yes	63.1342	yes	1.1274	no	0	no	0	no	0	no	0	no	0	yes	1.1274	no	0	no	0	3
313	G23	June	LKWS	NA	0.701	9	0	yes	218.26	no	0	yes	216.833	yes	1.42653	no	0	yes	17.1184	yes	17.1184	no	0	no	0	yes	1.42653	no	0	no	0	4
314	G26	June	LKWS	Harem	2	18	>0.3	yes	1.5	no	0	yes	1.5	no	0	no	0	yes	1	yes	1	no	0	no	0	no	0	no	0	no	0	2
315	G26	June	LKWS	Harem	2	18	>0.3	no	0	no	0	no	0	no	0	no	0	no	0	no	0	no	0	no	0	no	0	no	0	no	0	0
316	G26	June	LKWS	Harem	2	18	>0.3	no	0	no	0	no	0	no	0	no	0	no	0	no	0	no	0	no	0	no	0	no	0	no	0	0
317	G26	June	LKWS	Harem	2	18	>0.3	yes	6.5	yes	0.5	yes	5.5	yes	0.5	no	0	yes	2	yes	0.5	yes	1	no	0	yes	0.5	no	0	no	0	5
318	G26	June	LKWS	Harem	2	18	>0.3	no	0	no	0	no	0	no	0	no	0	no	0	no	0	no	0	no	0	no	0	no	0	no	0	0
319	G26	June	LKWS	Harem	2	18	>0.3	yes	1.5	no	0	yes	1.5	no	0	no	0	yes	0.5	no	0	yes	0.5	no	0	no	0	no	0	no	0	2
320	G26	June	LKWS	Harem	1.945	18	>0.3	yes	0.514139	no	0	yes	0.514139	no	0	no	0	yes	0.514139	yes	0.514139	no	0	no	0	no	0	no	0	no	0	2
321	G26	June	LKWS	Harem	2	18	>0.3	yes	16	no	0	yes	15	no	0	yes	1	yes	2	no	0	yes	2	no	0	no	0	no	0	no	0	3
322	G26	June	LKWS	Harem	2	18	>0.3	yes	13	no	0	yes	13	no	0	no	0	yes	1	no	0	yes	1	no	0	no	0	no	0	no	0	2
323	G26	June	LKWS	Harem	1.362	18	>0.3	yes	4.40529	no	0	yes	4.40529	no	0	no	0	no	0	no	0	no	0	no	0	no	0	no	0	no	0	1
324	G26	June	LKWS	Harem	1.542	18	>0.3	yes	3.24254	no	0	yes	3.24254	no	0	no	0	no	0	no	0	no	0	no	0	no	0	no	0	no	0	1
325	G26	June	LKWS	Harem	2	18	>0.3	yes	2	no	0	yes	2	no	0	no	0	yes	2	yes	1	yes	1	no	0	no	0	no	0	no	0	3
326	G26	June	LKWS	Harem	1.448	18	>0.3	yes	11.7403	yes	1.38122	yes	7.59669	yes	2.76243	no	0	no	0	no	0	no	0	no	0	no	0	no	0	no	0	2
327	G26	June	LKWS	Harem	2	18	>0.3	yes	29	no	0	yes	29	no	0	no	0	yes	3	yes	1	yes	2	no	0	yes	2	no	0	no	0	4
328	G26	June	LKWS	Harem	1.322	18	>0.3	yes	3.78215	no	0	yes	3.78215	no	0	no	0	no	0	no	0	no	0	no	0	no	0	no	0	no	0	1
329	G26	June	LKWS	Harem	1.744	18	>0.3	no	0	no	0	no	0	no	0	no	0	yes	0.573394	NA	NA	NA	NA	NA	0	no	0	no	0	no	0	NA
330	G26	June	LKWS	Harem	0.895	18	>0.3	yes	4.46927	no	0	yes	4.46927	no	0	no	0	no	0	no	0	no	0	no	0	no	0	no	0	no	0	1
331	G26	June	LKWS	Harem	2	18	>0.3	yes	6	no	0	yes	6	no	0	no	0	no	0	no	0	no	0	no	0	no	0	no	0	no	0	1
332	G26	June	LKWS	Harem	2	18	>0.3	yes	4	no	0	yes	4	no	0	no	0	no	0	no	0	no	0	no	0	no	0	no	0	no	0	1
334	G26	June	LKWS	Harem	1.833	18	>0.3	yes	1.09111	no	0	yes	0.545554	yes	0.545554	no	0	yes	0.545554	yes	0.545554	no	0	no	0	no	0	no	0	no	0	3
335	G26	June	LKWS	Harem	1.373	18	>0.3	yes	2.185	no	0	yes	2.185	no	0	no	0	yes	1.45666	yes	1.45666	no	0	no	0	no	0	no	0	no	0	2
336	G26	June	LKWS	Harem	2	18	>0.3	yes	12	no	0	yes	12	no	0	no	0	yes	4	yes	3	yes	1	no	0	no	0	no	0	no	0	3
337	G26	June	LKWS	Harem	2	18	>0.3	yes	5	no	0	yes	5	no	0	no	0	yes	1	no	0	yes	1	no	0	no	0	no	0	no	0	2
338	G26	June	LKWS	Harem	1.593	18	>0.3	yes	1.88324	no	0	yes	1.88324	no	0	no	0	yes	0.627746	no	0	yes	0.627746	no	0	no	0	no	0	no	0	2
339	G26	June	LKWS	Harem	2	18	>0.3	yes	4	no	0	yes	4	no	0	no	0	no	0	no	0	no	0	no	0	no	0	no	0	no	0	1
340	G26	June	LKWS	Harem	0.884	18	>0.3	yes	62.2172	no	0	yes	61.086	yes	1.13122	no	0	no	0	no	0	no	0	no	0	no	0	no	0	no	0	2
341	G26	June	LKWS	Harem	1.241	18	>0.3	yes	2.41741	no	0	yes	2.41741	no	0	no	0	no	0	no	0	no	0	no	0	no	0	no	0	no	0	1
342	G26	June	LKWS	Harem	1.315	18	>0.3	yes	0.760456	no	0	yes	0.760456	no	0	no	0	yes	0.760456	yes	0.760456	no	0	no	0	no	0	no	0	no	0	2
343	G26	June	LKWS	Harem	1.633	18	>0.3	yes	2.44948	no	0	yes	1.83711	yes	0.61237	no	0	no	0	no	0	no	0	no	0	no	0	no	0	no	0	2
344	G26	June	LKWS	Harem	1.441	18	>0.3	yes	0.693963	no	0	no	0	yes	0.693963	no	0	no	0	no	0	no	0	no	0	no	0	no	0	no	0	1
345	G26	June	LKWS	Harem	1.928	18	>0.3	no	0	no	0	no	0	no	0	no	0	no	0	no	0	no	0	no	0	no	0	no	0	no	0	0
346	G26	June	LKWS	Harem	1.663	18	>0.3	no	0	no	0	no	0	no	0	no	0	no	0	no	0	no	0	no	0	no	0	no	0	no	0	0
347	G26	June	LKWS	Harem	2	18	>0.3	yes	4	no	0	yes	4	no	0	no	0	no	0	no	0	no	0	no	0	no	0	no	0	no	0	1
348	G26	June	LKWS	Harem	1.192	18	>0.3	yes	7.55034	no	0	yes	6.71141	yes	0.838926	no	0	no	0	no	0	no	0	no	0	no	0	no	0	no	0	2
349	G26	June	LKWS	Harem	1.16	18	>0.3	yes	5.17241	yes	0.862069	yes	4.31034	no	0	no	0	no	0	no	0	no	0	no	0	no	0	no	0	no	0	2
350	G26	June	LKWS	Harem	0.812	18	>0.3	yes	23.399	no	0	yes	23.399	no	0	no	0	no	0	no	0	no	0	no	0	no	0	no	0	no	0	1
351	G26	June	LKWS	Harem	0.947	18	>0.3	yes	8.44773	no	0	yes	6.3358	yes	2.11193	no	0	yes	1.05597	yes	1.05597	no	0	no	0	no	0	no	0	no	0	3
352	G26	June	LKWS	Harem	1.385	18	>0.3	yes	1.44404	no	0	yes	1.44404	no	0	no	0	yes	0.722022	yes	0.722022	no	0	no	0	no	0	no	0	no	0	2
353	G26	June	LKWS	Harem	0.931	18	>0.3	yes	3.22234	no	0	yes	3.22234	no	0	no	0	no	0	no	0	no	0	no	0	no	0	no	0	no	0	1
354	G26	June	LKWS	Harem	1.127	18	>0.3	yes	12.4224	no	0	yes	12.4224	no	0	no	0	no	0	no	0	no	0	no	0	no	0	no	0	no	0	1
355	G26	June	LKWS	Harem	1.576	18	>0.3	no	0	no	0	no	0	no	0	no	0	no	0	no	0	no	0	no	0	no	0	no	0	no	0	0
357	G26	June	LKWS	Harem	0.667	18	>0.3	yes	26.9865	no	0	yes	26.9865	no	0	no	0	yes	2.9985	yes	1.49925	yes	1.49925	no	0	no	0	no	0	no	0	3
359	G26	June	LKWS	Harem	0.877	18	>0.3	yes	42.1893	no	0	yes	42.1893	no	0	no	0	yes	2.2805	yes	2.2805	no	0	no	0	no	0	no	0	no	0	2
361	G26	June	LKWS	Harem	0.594	18	>0.3	yes	23.569	no	0	yes	23.569	no	0	no	0	no	0	no	0	no	0	no	0	no	0	no	0	no	0	1
363	G26	June	LKWS	Harem	0.277	18	>0.3	yes	28.8809	no	0	yes	28.8809	no	0	no	0	yes	7.22022	NA	NA	NA	NA	NA	0	no	0	no	0	no	0	NA
364	G28	June	LKWS	Harem	2	18	>0.3	yes	25	no	0	yes	24	yes	1	no	0	yes	5	yes	2.5	no	0	no	0	yes	1	no	0	no	0	4
365	G28	June	LKWS	Harem	2	18	>0.3	yes	31	no	0	yes	31	no	0	no	0	no	0	no	0	no	0	no	0	no	0	no	0	no	0	1
366	G28	June	LKWS	Harem	2	18	>0.3	yes	4	no	0	yes	4	no	0	no	0	no	0	no	0	no	0	no	0	no	0	no	0	no	0	1
367	G28	June	LKWS	Harem	2	18	>0.3	yes	12	no	0	yes	12	no	0	no	0	yes	1	yes	0.5	no	0	no	0	no	0	no	0	no	0	2
368	G28	June	LKWS	Harem	2	18	>0.3	yes	14	no	0	yes	13	no	0	yes	1	no	0	no	0	no	0	no	0	no	0	no	0	no	0	2
369	G28	June	LKWS	Harem	2	18	>0.3	yes	5	no	0	yes	5	no	0	no	0	no	0	no	0	no	0	no	0	no	0	no	0	no	0	1
370	G28	June	LKWS	Harem	2	18	>0.3	no	0	no	0	no	0	no	0	no	0	yes	2	yes	1	no	0	no	0	no	0	no	0	no	0	1
371	G28	June	LKWS	Harem	1.789	18	>0.3	yes	1.67691	no	0	yes	1.67691	no	0	no	0	yes	6.14869	yes	2.23589	yes	2.79486	no	0	no	0	no	0	no	0	3
372	G28	June	LKWS	Harem	1.947	18	>0.3	no	0	no	0	no	0	no	0	no	0	yes	1.02722	yes	1.02722	no	0	no	0	no	0	no	0	no	0	1
373	G28	June	LKWS	Harem	2	18	>0.3	no	0	no	0	no	0	no	0	no	0	yes	1	yes	0.5	no	0	no	0	yes	2	no	0	no	0	2
374	G28	June	LKWS	Harem	1.301	18	>0.3	yes	4.61184	no	0	yes	4.61184	no	0	no	0	no	0	no	0	no	0	no	0	no	0	no	0	no	0	1
375	G28	June	LKWS	Harem	2	18	>0.3	yes	3	no	0	yes	3	no	0	no	0	yes	1	NA	NA	NA	NA	NA	0	no	0	no	0	no	0	NA
376	G28	June	LKWS	Harem	2	18	>0.3	yes	3	no	0	yes	3	no	0	no	0	no	0	no	0	no	0	no	0	no	0	no	0	no	0	1
377	G28	June	LKWS	Harem	1.81	18	>0.3	yes	34.8066	no	0	yes	34.8066	no	0	no	0	yes	1.65746	yes	1.65746	no	0	no	0	yes	0.552486	yes	0.552486	no	0	4
378	G28	June	LKWS	Harem	1.877	18	>0.3	no	0	no	0	no	0	no	0	no	0	no	0	no	0	no	0	no	0	no	0	no	0	no	0	0
379	G28	June	LKWS	Harem	2	18	>0.3	yes	42	no	0	yes	42	no	0	no	0	no	0	no	0	no	0	no	0	no	0	no	0	no	0	1
380	G28	June	LKWS	Harem	2	18	>0.3	no	0	no	0	no	0	no	0	no	0	no	0	no	0	no	0	no	0	no	0	no	0	no	0	0
381	G28	June	LKWS	Harem	2	18	>0.3	yes	5	no	0	yes	5	no	0	no	0	yes	5	yes	0.5	yes	2	no	0	yes	1	no	0	no	0	4
382	G28	June	LKWS	Harem	2	18	>0.3	yes	9	no	0	yes	9	no	0	no	0	no	0	no	0	no	0	no	0	yes	1	yes	1	no	0	3
383	G28	June	LKWS	Harem	2	18	>0.3	yes	12	no	0	yes	12	no	0	no	0	yes	3	yes	1	yes	0.5	no	0	no	0	yes	1	no	0	4
384	G28	June	LKWS	Harem	1.542	18	>0.3	yes	20.7523	no	0	yes	20.7523	no	0	no	0	yes	1.94553	yes	1.94553	no	0	no	0	yes	2.59403	yes	0.648508	no	0	4
385	G28	June	LKWS	Harem	2	18	>0.3	yes	8	no	0	yes	8	no	0	no	0	no	0	no	0	no	0	no	0	no	0	no	0	no	0	1
386	G28	June	LKWS	Harem	1.594	18	>0.3	no	0	no	0	no	0	no	0	no	0	yes	1.25471	yes	0.627353	yes	0.627353	no	0	no	0	no	0	no	0	2
387	G28	June	LKWS	Harem	1.897	18	>0.3	yes	4.74433	no	0	yes	4.21719	yes	0.527148	no	0	no	0	no	0	no	0	no	0	no	0	yes	0.527148	no	0	3
388	G28	June	LKWS	Harem	2	18	>0.3	yes	1	no	0	yes	1	no	0	no	0	no	0	no	0	no	0	no	0	no	0	no	0	no	0	1
389	G28	June	LKWS	Harem	1.948	18	>0.3	yes	1.02669	no	0	yes	1.02669	no	0	no	0	no	0	no	0	no	0	no	0	no	0	yes	2.05339	no	0	2
390	G28	June	LKWS	Harem	2	18	>0.3	yes	2	no	0	yes	2	no	0	no	0	yes	1	no	0	yes	0.5	no	0	yes	1	yes	5	no	0	4
391	G28	June	LKWS	Harem	1.935	18	>0.3	yes	2.58398	no	0	yes	2.58398	no	0	no	0	no	0	no	0	no	0	no	0	no	0	yes	4.13437	no	0	2
392	G28	June	LKWS	Harem	1.305	18	>0.3	yes	55.9387	no	0	yes	55.9387	no	0	no	0	yes	0.766284	yes	0.766284	no	0	no	0	yes	2.29885	no	0	no	0	3
393	G28	June	LKWS	Harem	1.938	18	>0.3	no	0	no	0	no	0	no	0	no	0	yes	0.515996	yes	0.515996	no	0	no	0	yes	0.515996	no	0	no	0	2
394	G28	June	LKWS	Harem	1.004	18	>0.3	no	0	no	0	no	0	no	0	no	0	no	0	no	0	no	0	no	0	no	0	no	0	no	0	0
395	G28	June	LKWS	Harem	1.062	18	>0.3	yes	32.0151	no	0	yes	30.1318	yes	1.88324	no	0	yes	1.88324	yes	1.88324	no	0	no	0	no	0	no	0	no	0	3
396	G28	June	LKWS	Harem	1.023	18	>0.3	no	0	no	0	no	0	no	0	no	0	yes	0.977517	NA	NA	NA	NA	NA	0	no	0	no	0	no	0	NA
397	G28	June	LKWS	Harem	1.252	18	>0.3	yes	0.798722	no	0	yes	0.798722	no	0	no	0	yes	0.798722	yes	0.798722	no	0	no	0	no	0	no	0	no	0	2
398	G28	June	LKWS	Harem	1.504	18	>0.3	yes	1.99468	no	0	yes	1.32979	yes	0.664894	no	0	yes	1.32979	yes	0.664894	yes	0.664894	no	0	no	0	no	0	no	0	3
399	G28	June	LKWS	Harem	1.844	18	>0.3	yes	1.0846	no	0	yes	1.0846	no	0	no	0	yes	0.542299	NA	NA	NA	NA	NA	0	no	0	no	0	no	0	NA
400	G28	June	LKWS	Harem	1.433	18	>0.3	yes	4.88486	no	0	yes	4.88486	no	0	no	0	no	0	no	0	no	0	no	0	no	0	no	0	no	0	1
401	G28	June	LKWS	Harem	1.503	18	>0.3	no	0	no	0	no	0	no	0	no	0	no	0	no	0	no	0	no	0	no	0	no	0	no	0	0
402	G28	June	LKWS	Harem	0.924	18	>0.3	yes	4.329	no	0	yes	4.329	no	0	no	0	no	0	no	0	no	0	no	0	no	0	no	0	no	0	1
403	G28	June	LKWS	Harem	0.831	18	>0.3	yes	33.6943	no	0	yes	31.2876	yes	2.40674	no	0	yes	3.61011	yes	2.40674	no	0	no	0	no	0	no	0	no	0	3
404	G28	June	LKWS	Harem	1.245	18	>0.3	yes	25.7028	no	0	yes	25.7028	no	0	no	0	no	0	no	0	no	0	no	0	no	0	yes	0.803213	no	0	2
406	G28	June	LKWS	Harem	1.099	18	>0.3	yes	1.81984	no	0	yes	1.81984	no	0	no	0	no	0	no	0	no	0	no	0	no	0	no	0	no	0	1
407	G28	June	LKWS	Harem	0.915	18	>0.3	yes	5.46448	no	0	yes	5.46448	no	0	no	0	no	0	no	0	no	0	no	0	no	0	no	0	no	0	1
408	G28	June	LKWS	Harem	1.117	18	>0.3	yes	3.58102	no	0	yes	3.58102	no	0	no	0	yes	3.58102	yes	1.79051	yes	1.79051	no	0	no	0	no	0	no	0	3
410	G28	June	LKWS	Harem	0.838	18	>0.3	yes	445.107	no	0	yes	445.107	no	0	no	0	yes	16.7064	yes	16.7064	no	0	no	0	no	0	no	0	no	0	2
411	G29	July	LKWS	Harem	2	11	>0.3	yes	6	no	0	yes	6	no	0	no	0	no	0	no	0	no	0	no	0	yes	1	no	0	no	0	2
412	G29	July	LKWS	Harem	2	11	>0.3	no	0	no	0	no	0	no	0	no	0	yes	0.5	yes	0.5	no	0	no	0	no	0	no	0	no	0	1
413	G29	July	LKWS	Harem	2	11	>0.3	no	0	no	0	no	0	no	0	no	0	yes	1	yes	1	no	0	no	0	yes	1	no	0	no	0	2
414	G29	July	LKWS	Harem	2	11	>0.3	yes	NA	NA	NA	NA	NA	NA	NA	NA	NA	no	0	no	0	no	0	no	0	no	0	no	0	no	0	NA
415	G29	July	LKWS	Harem	2	11	>0.3	yes	18	yes	1	yes	17	no	0	no	0	yes	1	yes	1	no	0	no	0	no	0	no	0	no	0	3
417	G29	July	LKWS	Harem	2	11	>0.3	no	0	no	0	no	0	no	0	no	0	no	0	no	0	no	0	no	0	no	0	no	0	no	0	0
418	G29	July	LKWS	Harem	2	11	>0.3	yes	13.5	no	0	yes	11.5	yes	2	no	0	yes	0.5	no	0	yes	0.5	no	0	no	0	no	0	no	0	3
419	G29	July	LKWS	Harem	2	11	>0.3	yes	1	no	0	no	0	yes	1	no	0	yes	1	yes	1	no	0	no	0	yes	1	no	0	no	0	3
421	G29	July	LKWS	Harem	2	11	>0.3	yes	5	no	0	yes	5	no	0	no	0	no	0	no	0	no	0	no	0	no	0	no	0	no	0	1
422	G29	July	LKWS	Harem	2	11	>0.3	yes	1	no	0	yes	1	no	0	no	0	no	0	no	0	no	0	no	0	yes	0.5	no	0	no	0	2
424	G29	July	LKWS	Harem	2	11	>0.3	no	0	no	0	no	0	no	0	no	0	no	0	no	0	no	0	no	0	yes	1	no	0	no	0	1
426	G29	July	LKWS	Harem	2	11	>0.3	yes	8	no	0	yes	8	no	0	no	0	yes	3	yes	3	no	0	no	0	yes	4	no	0	no	0	3
427	G29	July	LKWS	Harem	1.375	11	>0.3	yes	2.18182	no	0	yes	2.18182	no	0	no	0	yes	2.18182	yes	2.18182	no	0	no	0	yes	2.2	no	0	no	0	3
428	G29	July	LKWS	Harem	1.417	11	>0.3	yes	1.41143	no	0	yes	0.705716	yes	0.705716	no	0	no	0	no	0	no	0	no	0	no	0	no	0	no	0	2
429	G29	July	LKWS	Harem	2	11	>0.3	no	0	no	0	no	0	no	0	no	0	yes	1	yes	1	no	0	no	0	yes	4	no	0	no	0	2
430	G29	July	LKWS	Harem	2	11	>0.3	yes	8	no	0	yes	8	no	0	no	0	no	0	no	0	no	0	no	0	yes	2	no	0	no	0	2
431	G29	July	LKWS	Harem	2	11	>0.3	yes	11	no	0	yes	10	yes	1	no	0	yes	2	yes	1	yes	1	no	0	yes	2	no	0	no	0	5
432	G29	July	LKWS	Harem	2	11	>0.3	yes	9	yes	0.5	yes	8.5	no	0	no	0	no	0	no	0	no	0	no	0	no	0	no	0	no	0	2
433	G29	July	LKWS	Harem	1.48	11	>0.3	yes	4.72973	no	0	yes	4.72973	no	0	no	0	no	0	no	0	no	0	no	0	no	0	no	0	no	0	1
434	G29	July	LKWS	Harem	1.073	11	>0.3	yes	18.6393	no	0	yes	18.6393	no	0	no	0	yes	0.931966	NA	NA	NA	NA	NA	0	no	0	no	0	no	0	NA
437	G29	July	LKWS	Harem	1.832	11	>0.3	yes	1.0917	no	0	yes	1.0917	no	0	no	0	no	0	no	0	no	0	no	0	no	0	no	0	no	0	1
438	G29	July	LKWS	Harem	1.723	11	>0.3	yes	6.38421	no	0	yes	6.38421	no	0	no	0	no	0	no	0	no	0	no	0	no	0	no	0	no	0	1
439	G29	July	LKWS	Harem	2	11	>0.3	yes	NA	NA	NA	NA	NA	NA	NA	NA	NA	yes	1	yes	1	no	0	no	0	yes	0.5	no	0	no	0	NA
440	G29	July	LKWS	Harem	1.773	11	>0.3	yes	30.4569	no	0	yes	30.4569	no	0	no	0	no	0	no	0	no	0	no	0	no	0	no	0	no	0	1
441	G29	July	LKWS	Harem	2	11	>0.3	yes	6	no	0	yes	6	no	0	no	0	no	0	no	0	no	0	no	0	yes	1	no	0	no	0	2
442	G29	July	LKWS	Harem	2	11	>0.3	no	0	no	0	no	0	no	0	no	0	no	0	no	0	no	0	no	0	yes	3	no	0	no	0	1
443	G29	July	LKWS	Harem	1.264	11	>0.3	no	0	no	0	no	0	no	0	no	0	no	0	no	0	no	0	no	0	no	0	no	0	no	0	0
444	G29	July	LKWS	Harem	1.352	11	>0.3	yes	0.739645	no	0	no	0	yes	0.739645	no	0	no	0	no	0	no	0	no	0	no	0	no	0	no	0	1
445	G29	July	LKWS	Harem	1.124	11	>0.3	yes	1.77936	no	0	yes	1.77936	no	0	no	0	yes	1.77936	yes	1.77936	no	0	no	0	no	0	no	0	no	0	2
446	G29	July	LKWS	Harem	0.877	11	>0.3	yes	1.14025	no	0	yes	1.14025	no	0	no	0	yes	1.14025	yes	1.14025	no	0	no	0	no	0	no	0	no	0	2
447	G29	July	LKWS	Harem	1.094	11	>0.3	yes	3.65631	no	0	yes	3.65631	no	0	no	0	no	0	no	0	no	0	no	0	yes	0.914077	no	0	no	0	2
448	G29	July	LKWS	Harem	2	11	>0.3	yes	13	no	0	yes	13	no	0	no	0	yes	1	yes	1	no	0	no	0	yes	2	no	0	no	0	3
449	G29	July	LKWS	Harem	1.47	11	>0.3	yes	1.36054	no	0	yes	1.36054	no	0	no	0	yes	0.680272	yes	0.680272	no	0	no	0	no	0	no	0	no	0	2
450	G29	July	LKWS	Harem	1.37	11	>0.3	yes	35.7664	no	0	yes	35.7664	no	0	no	0	yes	1.45985	yes	1.45985	no	0	no	0	yes	2.18978	no	0	no	0	3
451	G29	July	LKWS	Harem	1.157	11	>0.3	yes	13.8289	yes	0.864304	yes	12.9646	no	0	no	0	no	0	no	0	no	0	no	0	no	0	no	0	no	0	2
452	G29	July	LKWS	Harem	1.072	11	>0.3	yes	2.79851	no	0	yes	1.86567	yes	0.932836	no	0	yes	0.932836	yes	0.932836	no	0	no	0	yes	10.2612	no	0	no	0	4
453	G29	July	LKWS	Harem	1.52	11	>0.3	no	0	no	0	no	0	no	0	no	0	yes	0.657895	no	0	yes	0.657895	no	0	no	0	no	0	no	0	1
455	G29	July	LKWS	Harem	1.271	11	>0.3	no	0	no	0	no	0	no	0	no	0	no	0	no	0	no	0	no	0	no	0	no	0	no	0	0
456	G29	July	LKWS	Harem	1.588	11	>0.3	yes	1.25945	no	0	yes	1.25945	no	0	no	0	yes	0.629723	no	0	no	0	yes	0	yes	0.629723	no	0	no	0	3
457	G29	July	LKWS	Harem	0.992	11	>0.3	yes	8.06452	no	0	yes	8.06452	no	0	no	0	no	0	no	0	no	0	no	0	no	0	no	0	no	0	1
458	G29	July	LKWS	Harem	0.745	11	>0.3	yes	4.02685	no	0	yes	2.68456	yes	1.34228	no	0	no	0	no	0	no	0	no	0	no	0	no	0	no	0	2
459	G29	July	LKWS	Harem	0.929	11	>0.3	yes	4.30571	no	0	yes	4.30571	no	0	no	0	no	0	no	0	no	0	no	0	no	0	no	0	no	0	1
461	G30	July	LKWS	Bachelor	2	8	0	yes	18	no	0	yes	18	no	0	no	0	no	0	no	0	no	0	no	0	yes	3	no	0	no	0	2
462	G30	July	LKWS	Bachelor	2	8	0	yes	1	no	0	yes	0.5	yes	0.5	no	0	yes	1	no	0	yes	1	no	0	yes	2.5	no	0	yes	0.5	5
463	G30	July	LKWS	Bachelor	2	8	0	no	0	no	0	no	0	no	0	no	0	no	0	no	0	no	0	no	0	no	0	no	0	no	0	0
464	G30	July	LKWS	Bachelor	1.3	8	0	yes	4.61538	no	0	yes	3.84615	yes	0.769231	no	0	no	0	no	0	no	0	no	0	yes	0.769231	no	0	yes	0.769231	4
465	G30	July	LKWS	Bachelor	2	8	0	no	0	no	0	no	0	no	0	no	0	yes	3.5	yes	1	yes	0.5	no	0	no	0	no	0	no	0	2
466	G30	July	LKWS	Bachelor	2	8	0	no	0	no	0	no	0	no	0	no	0	yes	0.5	yes	0.5	no	0	no	0	no	0	no	0	no	0	1
467	G30	July	LKWS	Bachelor	1.89	8	0	yes	2.1164	no	0	yes	2.1164	no	0	no	0	yes	0.52	yes	1.32802	yes	0.664011	no	0	yes	1.5873	no	0	no	0	4
468	G30	July	LKWS	Bachelor	2	8	0	no	0	no	0	no	0	no	0	no	0	yes	2.5	yes	0.5	yes	0.5	no	0	no	0	no	0	no	0	2
469	G30	July	LKWS	Bachelor	2	8	0	yes	3	no	0	yes	3	no	0	no	0	yes	1	NA	NA	NA	NA	NA	0	no	0	no	0	no	0	NA
470	G30	July	LKWS	Bachelor	1.981	8	0	no	0	no	0	no	0	no	0	no	0	yes	2.01918	yes	1.00959	no	0	no	0	no	0	no	0	no	0	1
471	G30	July	LKWS	Bachelor	2	8	0	no	0	no	0	no	0	no	0	no	0	yes	1	yes	0.5	yes	0.5	no	0	yes	1	no	0	no	0	3
472	G30	July	LKWS	Bachelor	2	8	0	no	0	no	0	no	0	no	0	no	0	yes	3	yes	1.5	no	0	no	0	no	0	no	0	no	0	1
473	G30	July	LKWS	Bachelor	1.74	8	0	yes	5.74713	no	0	yes	5.74713	no	0	no	0	yes	0.57	yes	0.574713	no	0	no	0	yes	0.574713	no	0	no	0	3
474	G30	July	LKWS	Bachelor	1.506	8	0	yes	10.6242	no	0	yes	7.30412	yes	3.32005	no	0	yes	1.99203	yes	1.32802	yes	0.664011	no	0	no	0	no	0	no	0	4
475	G30	July	LKWS	Bachelor	1.75	8	0	no	0	no	0	no	0	no	0	no	0	yes	0.571429	yes	0.571429	no	0	no	0	no	0	no	0	no	0	1
476	G30	July	LKWS	Bachelor	2	8	0	yes	2	no	0	yes	2	no	0	no	0	yes	2	yes	0.5	yes	0.5	no	0	no	0	no	0	no	0	3
477	G30	July	LKWS	Bachelor	2	8	0	no	0	no	0	no	0	no	0	no	0	no	0	no	0	no	0	no	0	no	0	no	0	no	0	0
478	G30	July	LKWS	Bachelor	1.776	8	0	yes	1.12613	no	0	yes	1.12613	no	0	no	0	no	0	no	0	no	0	no	0	no	0	no	0	no	0	1
479	G30	July	LKWS	Bachelor	2	8	0	no	0	no	0	no	0	no	0	no	0	no	0	no	0	no	0	no	0	no	0	no	0	no	0	0
480	G30	July	LKWS	Bachelor	1.076	8	0	yes	40.8922	no	0	yes	37.1747	yes	3.71747	no	0	yes	9.29368	yes	5.57621	yes	3.71747	no	0	yes	2.7881	no	0	no	0	5
481	G30	July	LKWS	Bachelor	1.222	8	0	no	0	no	0	no	0	no	0	no	0	yes	3.27332	yes	2.45499	yes	0.818331	no	0	no	0	no	0	no	0	2
482	G30	July	LKWS	Bachelor	1.749	8	0	yes	22.8702	no	0	yes	22.8702	no	0	no	0	yes	2.85878	yes	2.85878	no	0	no	0	yes	0.571755	no	0	no	0	3
483	G30	July	LKWS	Bachelor	1.437	8	0	yes	55.6715	no	0	yes	55.6715	no	0	no	0	yes	6.26305	yes	2.08768	yes	2.08768	no	0	yes	2.78358	no	0	no	0	4
484	G30	July	LKWS	Bachelor	1.193	8	0	yes	56.9992	no	0	yes	56.9992	no	0	no	0	yes	3.35289	yes	2.51467	no	0	yes	0	no	0	yes	0.838223	no	0	4
486	G30	July	LKWS	Bachelor	1.412	8	0	yes	21.2465	no	0	yes	19.83	yes	1.41643	no	0	yes	1.41643	yes	1.41643	no	0	no	0	no	0	no	0	no	0	3
487	G30	July	LKWS	Bachelor	1.13	8	0	yes	39.823	no	0	yes	39.823	no	0	no	0	yes	6.19469	yes	4.42478	yes	1.76991	no	0	no	0	no	0	no	0	3
488	G30	July	LKWS	Bachelor	1.208	8	0	yes	4.96689	no	0	yes	4.13907	yes	0.827815	no	0	yes	0.827815	yes	0.827815	no	0	no	0	no	0	no	0	yes	0.827815	4
489	G30	July	LKWS	Bachelor	2	8	0	yes	29	no	0	yes	29	no	0	no	0	yes	2	yes	1	no	0	no	0	yes	3	no	0	yes	1	4
490	G30	July	LKWS	Bachelor	1.331	8	0	yes	9.01578	no	0	yes	9.01578	no	0	no	0	no	0	no	0	no	0	no	0	no	0	no	0	no	0	1
491	G30	July	LKWS	Bachelor	0.655	8	0	yes	38.1679	no	0	yes	38.1679	no	0	no	0	no	0	no	0	no	0	no	0	no	0	no	0	no	0	1
492	G30	July	LKWS	Bachelor	0.794	8	0	yes	125.945	no	0	yes	125.945	no	0	no	0	yes	2.51889	yes	2.51889	no	0	no	0	yes	2.51889	no	0	no	0	3
493	G30	July	LKWS	Bachelor	0.802	8	0	yes	2.49377	no	0	yes	1.24688	no	0	yes	1.24688	no	0	no	0	no	0	no	0	no	0	no	0	no	0	2
494	G30	July	LKWS	Bachelor	0.694	8	0	yes	76.3689	no	0	yes	76.3689	no	0	no	0	yes	1.44092	yes	1.44092	no	0	no	0	yes	1.44092	no	0	no	0	3
495	G30	July	LKWS	Bachelor	0.569	8	0	yes	72.0562	no	0	yes	70.2988	yes	1.75747	no	0	yes	3.51494	no	0	yes	3.51494	no	0	no	0	no	0	no	0	3
497	G30	July	LKWS	Bachelor	0.801	8	0	yes	93.633	yes	1.24844	yes	92.3845	no	0	no	0	yes	3.74532	yes	1.24844	no	0	no	0	no	0	no	0	no	0	3
498	G30	July	LKWS	Bachelor	0.397	8	0	yes	65.4912	no	0	yes	65.4912	no	0	no	0	yes	10.0756	yes	10.0756	no	0	no	0	no	0	no	0	no	0	2
499	G30	July	LKWS	Bachelor	0.768	8	0	yes	36.4583	no	0	yes	36.4583	no	0	no	0	yes	2.60417	yes	1.30208	yes	1.30208	no	0	no	0	no	0	no	0	3
503	G30	July	LKWS	Bachelor	1.621	8	0	yes	21.5916	no	0	yes	21.5916	no	0	no	0	no	0	no	0	no	0	no	0	no	0	no	0	no	0	1
504	G31	July	LKWS	Harem	2	4	<0.3	yes	1.5	no	0	yes	1.5	no	0	no	0	yes	0.5	yes	0.5	no	0	no	0	no	0	no	0	no	0	2
505	G31	July	LKWS	Harem	2	4	<0.3	yes	34	no	0	yes	32	yes	2	no	0	no	0	no	0	no	0	no	0	no	0	no	0	no	0	2
506	G31	July	LKWS	Harem	2	4	<0.3	no	0	no	0	no	0	no	0	no	0	yes	1	no	0	yes	0.5	no	0	no	0	no	0	yes	0.5	2
507	G31	July	LKWS	Harem	2	4	<0.3	no	0	no	0	no	0	no	0	no	0	no	0	no	0	no	0	no	0	no	0	no	0	no	0	0
508	G31	July	LKWS	Harem	2	4	<0.3	yes	1.5	no	0	yes	0.5	yes	1	no	0	yes	0.5	yes	0.5	no	0	no	0	no	0	no	0	yes	0.5	4
509	G31	July	LKWS	Harem	2	4	<0.3	no	0	no	0	no	0	no	0	no	0	no	0	no	0	no	0	no	0	no	0	no	0	yes	0.5	1
510	G31	July	LKWS	Harem	2	4	<0.3	yes	1	no	0	no	0	yes	1	no	0	no	0	no	0	no	0	no	0	yes	1	no	0	no	0	2
511	G31	July	LKWS	Harem	2	4	<0.3	yes	33	no	0	yes	31	yes	2	no	0	no	0	no	0	no	0	no	0	no	0	no	0	no	0	2
512	G31	July	LKWS	Harem	2	4	<0.3	yes	0.5	no	0	yes	0.5	no	0	no	0	yes	1	yes	0.5	yes	0.5	no	0	no	0	no	0	no	0	3
513	G31	July	LKWS	Harem	2	4	<0.3	yes	0.5	no	0	yes	0.5	no	0	no	0	no	0	no	0	no	0	no	0	no	0	no	0	no	0	1
513	G31	July	LKWS	Harem	2	4	<0.3	yes	0.5	no	0	yes	0.5	no	0	no	0	no	0	no	0	no	0	no	0	no	0	no	0	no	0	1
514	G31	July	LKWS	Harem	2	4	<0.3	yes	4	no	0	yes	4	no	0	no	0	no	0	no	0	no	0	no	0	no	0	no	0	yes	0.5	2
515	G31	July	LKWS	Harem	2	4	<0.3	yes	41	no	0	yes	41	no	0	no	0	yes	6	yes	5	yes	1	no	0	no	0	no	0	no	0	3
516	G31	July	LKWS	Harem	1.605	4	<0.3	yes	1.24611	no	0	yes	1.24611	no	0	no	0	no	0	no	0	no	0	no	0	no	0	no	0	no	0	1
517	G31	July	LKWS	Harem	2	4	<0.3	yes	20	no	0	yes	20	no	0	no	0	no	0	no	0	no	0	no	0	no	0	no	0	no	0	1
518	G31	July	LKWS	Harem	2	4	<0.3	yes	15	no	0	yes	15	no	0	no	0	yes	6	yes	4	yes	2	no	0	no	0	no	0	no	0	3
519	G31	July	LKWS	Harem	1.683	4	<0.3	no	0	no	0	no	0	no	0	no	0	no	0	no	0	no	0	no	0	no	0	no	0	no	0	0
520	G31	July	LKWS	Harem	1.242	4	<0.3	yes	1.61031	no	0	yes	1.61031	no	0	no	0	no	0	no	0	no	0	no	0	yes	0.805153	no	0	no	0	2
521	G31	July	LKWS	Harem	2	4	<0.3	yes	1	no	0	yes	1	no	0	no	0	yes	1	yes	1	no	0	no	0	no	0	no	0	no	0	2
522	G31	July	LKWS	Harem	2	4	<0.3	no	0	no	0	no	0	no	0	no	0	no	0	no	0	no	0	no	0	no	0	no	0	no	0	0
523	G31	July	LKWS	Harem	1.964	4	<0.3	yes	4.07332	no	0	yes	4.07332	no	0	no	0	yes	1.52749	yes	1.52749	no	0	no	0	no	0	no	0	no	0	2
524	G31	July	LKWS	Harem	1.305	4	<0.3	yes	42.9119	no	0	yes	39.0805	yes	3.83142	no	0	yes	0.766284	yes	0.766284	no	0	no	0	no	0	no	0	no	0	3
525	G31	July	LKWS	Harem	1.967	4	<0.3	yes	16.7768	no	0	yes	16.7768	no	0	no	0	no	0	no	0	no	0	no	0	no	0	no	0	no	0	1
526	G31	July	LKWS	Harem	1.919	4	<0.3	yes	18.2387	no	0	yes	17.7176	yes	0.521105	no	0	yes	5.21105	yes	3.12663	yes	0.521105	no	0	no	0	no	0	no	0	4
527	G31	July	LKWS	Harem	1.557	4	<0.3	yes	2.56904	no	0	yes	1.92678	yes	0.642261	no	0	yes	1.28452	yes	1.28452	no	0	no	0	no	0	no	0	no	0	3
528	G31	July	LKWS	Harem	0.915	4	<0.3	yes	38.2514	yes	2.18579	yes	36.0656	no	0	no	0	no	0	no	0	no	0	no	0	no	0	no	0	no	0	2
529	G31	July	LKWS	Harem	2	4	<0.3	yes	19	no	0	yes	19	no	0	no	0	yes	2	yes	2	no	0	no	0	no	0	no	0	no	0	2
530	G31	July	LKWS	Harem	2	4	<0.3	yes	122	no	0	yes	120	yes	1	yes	1	yes	2.5	yes	2	no	0	no	0	yes	1	no	0	yes	0.5	6
531	G31	July	LKWS	Harem	1.268	4	<0.3	no	0	no	0	no	0	no	0	no	0	yes	0.788644	NA	NA	NA	NA	NA	0	no	0	no	0	yes	2.36593	NA
532	G31	July	LKWS	Harem	1.767	4	<0.3	yes	27.1647	no	0	yes	27.1647	no	0	no	0	yes	6.22524	yes	2.82965	yes	2.26372	no	0	yes	1.13186	no	0	no	0	4
533	G31	July	LKWS	Harem	1.772	4	<0.3	yes	3.95034	no	0	yes	2.25734	yes	1.693	no	0	yes	1.693	yes	0.564334	yes	1.12867	no	0	yes	0.564334	no	0	yes	1.693	6
534	G31	July	LKWS	Harem	1.576	4	<0.3	yes	5.71066	no	0	yes	5.71066	no	0	no	0	yes	0.634518	yes	0.634518	no	0	no	0	no	0	no	0	yes	0.634518	3
535	G31	July	LKWS	Harem	0.944	4	<0.3	yes	16.9492	yes	5.29661	yes	8.47458	yes	3.17797	no	0	yes	2.11864	yes	1.05932	yes	1.05932	no	0	no	0	no	0	no	0	4
536	G31	July	LKWS	Harem	1.744	4	<0.3	yes	18.3486	no	0	yes	18.3486	no	0	no	0	yes	1.14679	no	0	yes	0.573394	no	0	no	0	no	0	no	0	2
537	G31	July	LKWS	Harem	2	4	<0.3	yes	14	no	0	yes	14	no	0	no	0	yes	6	yes	4	yes	2	no	0	yes	3	no	0	no	0	4
538	G31	July	LKWS	Harem	1.675	4	<0.3	no	0	no	0	no	0	no	0	no	0	no	0	no	0	no	0	no	0	yes	0.597015	no	0	no	0	1
539	G31	July	LKWS	Harem	1.11	4	<0.3	yes	3.6036	no	0	yes	3.6036	no	0	no	0	no	0	no	0	no	0	no	0	yes	0.900901	no	0	no	0	2
540	G31	July	LKWS	Harem	0.883	4	<0.3	no	0	no	0	no	0	no	0	no	0	yes	2.26501	NA	NA	NA	NA	NA	0	no	0	no	0	no	0	NA
541	G31	July	LKWS	Harem	1.34	4	<0.3	yes	0.746269	no	0	yes	0.746269	no	0	no	0	yes	0.746269	yes	0.746269	no	0	no	0	no	0	no	0	no	0	2
542	G31	July	LKWS	Harem	1.354	4	<0.3	yes	0.738552	no	0	yes	0.738552	no	0	no	0	no	0	no	0	no	0	no	0	no	0	no	0	no	0	1
544	G31	July	LKWS	Harem	1.04	4	<0.3	yes	6.73077	no	0	yes	5.76923	yes	0.961538	no	0	no	0	no	0	no	0	no	0	no	0	no	0	no	0	2
545	G31	July	LKWS	Harem	1.792	4	<0.3	no	0	no	0	no	0	no	0	no	0	no	0	no	0	no	0	no	0	no	0	no	0	no	0	0
547	G31	July	LKWS	Harem	1.048	4	<0.3	yes	25.7634	no	0	yes	22.9008	yes	2.8626	no	0	yes	0.954198	yes	0.954198	no	0	no	0	no	0	no	0	no	0	3
549	G31	July	LKWS	Harem	0.681	4	<0.3	yes	271.659	no	0	yes	270.191	no	0	yes	1.46843	yes	13.2159	yes	13.2159	no	0	no	0	yes	5.87372	no	0	no	0	4
551	G31	July	LKWS	Harem	0.975	4	<0.3	yes	51.2821	no	0	yes	51.2821	no	0	no	0	yes	3.07692	yes	2.05128	no	0	yes	0	yes	1.02564	no	0	no	0	4
553	G31	July	LKWS	Harem	0.522	4	<0.3	yes	191.571	yes	1.91571	yes	178.161	yes	11.4943	no	0	yes	7.66284	yes	7.66284	no	0	no	0	no	0	no	0	no	0	3
554	G33	July	LKWS	Harem	2	7	>0.3	no	0	no	0	no	0	no	0	no	0	no	0	no	0	no	0	no	0	no	0	no	0	no	0	0
555	G33	July	LKWS	Harem	2	7	>0.3	yes	5.5	no	0	yes	5	yes	0.5	no	0	no	0	no	0	no	0	no	0	no	0	no	0	no	0	2
556	G33	July	LKWS	Harem	2	7	>0.3	yes	2.5	no	0	yes	1	yes	1.5	no	0	no	0	no	0	no	0	no	0	no	0	no	0	no	0	2
557	G33	July	LKWS	Harem	2	7	>0.3	yes	75	no	0	yes	74	yes	1	no	0	yes	2.5	yes	2	no	0	no	0	no	0	no	0	no	0	3
558	G33	July	LKWS	Harem	2	7	>0.3	yes	3	no	0	yes	3	no	0	no	0	yes	3	yes	3	no	0	no	0	yes	1	no	0	no	0	3
559	G33	July	LKWS	Harem	2	7	>0.3	yes	19	no	0	yes	19	no	0	no	0	yes	1	no	0	yes	1	no	0	yes	1	no	0	no	0	3
560	G33	July	LKWS	Harem	1.857	7	>0.3	no	0	no	0	no	0	no	0	no	0	yes	1.07701	NA	NA	NA	NA	NA	0	no	0	no	0	no	0	NA
561	G33	July	LKWS	Harem	1.932	7	>0.3	yes	5.69358	no	0	yes	5.69358	no	0	no	0	no	0	no	0	no	0	no	0	yes	0.517598	no	0	no	0	2
562	G33	July	LKWS	Harem	2.063	7	>0.3	yes	2.90839	no	0	yes	2.90839	no	0	no	0	yes	0.484731	no	0	yes	0.484731	no	0	yes	0.969462	no	0	no	0	3
563	G33	July	LKWS	Harem	2	7	>0.3	yes	4	no	0	yes	4	no	0	no	0	yes	1	yes	1	no	0	no	0	no	0	no	0	no	0	2
564	G33	July	LKWS	Harem	1.914	7	>0.3	yes	1.04493	no	0	no	0	yes	1.04493	no	0	yes	0.522466	yes	0.522466	no	0	no	0	no	0	no	0	no	0	2
565	G33	July	LKWS	Harem	1.065	7	>0.3	yes	28.169	no	0	yes	26.2911	yes	1.87793	no	0	no	0	no	0	no	0	no	0	yes	0.938967	no	0	no	0	3
566	G33	July	LKWS	Harem	1.564	7	>0.3	no	0	no	0	no	0	no	0	no	0	yes	1.27877	yes	0.639386	yes	0.639386	no	0	no	0	no	0	no	0	2
567	G33	July	LKWS	Harem	1.514	7	>0.3	yes	3.96301	no	0	yes	1.98151	yes	1.98151	no	0	no	0	no	0	no	0	no	0	no	0	no	0	no	0	2
568	G33	July	LKWS	Harem	1.518	7	>0.3	yes	1.31752	no	0	yes	1.31752	no	0	no	0	yes	1.97628	yes	1.31752	yes	0.658762	no	0	no	0	no	0	no	0	3
569	G33	July	LKWS	Harem	1.302	7	>0.3	yes	122.12	no	0	yes	122.12	no	0	no	0	yes	6.91244	yes	6.14439	yes	0.768049	no	0	yes	0.768049	yes	6.91244	no	0	5
570	G33	July	LKWS	Harem	1.506	7	>0.3	yes	2.65604	no	0	yes	1.32802	yes	1.32802	no	0	no	0	no	0	no	0	no	0	no	0	no	0	no	0	2
571	G33	July	LKWS	Harem	1.991	7	>0.3	yes	41.6876	no	0	yes	41.6876	no	0	no	0	yes	5.52486	yes	5.52486	no	0	no	0	yes	7.5339	no	0	no	0	3
572	G33	July	LKWS	Harem	0.341	7	>0.3	yes	99.7067	yes	5.8651	yes	90.9091	yes	2.93255	no	0	yes	2.93255	no	0	yes	2.93255	no	0	no	0	yes	2.93255	no	0	4
573	G33	July	LKWS	Harem	0.861	7	>0.3	yes	26.7131	no	0	yes	17.4216	yes	9.29152	no	0	yes	3.48432	yes	2.32288	yes	1.16144	no	0	no	0	no	0	no	0	4
574	G33	July	LKWS	Harem	0.774	7	>0.3	yes	14.2119	no	0	yes	12.9199	yes	1.29199	no	0	yes	3.87597	yes	2.58398	yes	1.29199	no	0	no	0	no	0	no	0	4
575	G33	July	LKWS	Harem	1.591	7	>0.3	yes	3.77121	no	0	yes	3.77121	no	0	no	0	yes	1.25707	yes	0.628536	no	0	no	0	no	0	no	0	no	0	2
576	G33	July	LKWS	Harem	1.247	7	>0.3	yes	6.4154	no	0	yes	6.4154	no	0	no	0	yes	2.40577	yes	1.60385	yes	0.801925	no	0	yes	0.801925	no	0	no	0	4
577	G33	July	LKWS	Harem	1.226	7	>0.3	yes	4.89396	no	0	yes	4.89396	no	0	no	0	no	0	no	0	no	0	no	0	no	0	no	0	no	0	1
578	G33	July	LKWS	Harem	1.321	7	>0.3	yes	1.514	no	0	yes	0.757002	yes	0.757002	no	0	yes	3.78501	yes	2.27101	yes	1.514	no	0	no	0	no	0	no	0	4
579	G33	July	LKWS	Harem	1.087	7	>0.3	yes	43.2383	no	0	yes	41.3983	yes	1.83993	no	0	yes	6.43974	yes	4.59982	yes	1.83993	no	0	no	0	no	0	no	0	4
580	G33	July	LKWS	Harem	1.006	7	>0.3	yes	54.672	no	0	yes	53.6779	yes	0.994036	no	0	yes	3.97614	yes	2.98211	yes	0.994036	no	0	no	0	no	0	no	0	4
581	G33	July	LKWS	Harem	1.073	7	>0.3	yes	60.5778	no	0	yes	60.5778	no	0	no	0	yes	1.86393	yes	0.931966	no	0	yes	0	yes	3.72787	no	0	no	0	4
582	G33	July	LKWS	Harem	1.111	7	>0.3	no	0	no	0	no	0	no	0	no	0	yes	1.80018	NA	NA	NA	NA	NA	0	no	0	yes	1.80018	no	0	NA
583	G33	July	LKWS	Harem	1.084	7	>0.3	yes	39.6679	no	0	yes	39.6679	no	0	no	0	no	0	no	0	no	0	no	0	yes	0.922509	no	0	no	0	2
584	G33	July	LKWS	Harem	0.869	7	>0.3	yes	85.1554	no	0	yes	85.1554	no	0	no	0	yes	3.45224	no	0	yes	3.45224	no	0	no	0	yes	2.3015	no	0	3
585	G33	July	LKWS	Harem	1.485	7	>0.3	yes	2.6936	no	0	yes	2.6936	no	0	no	0	yes	0.673401	yes	0.673401	no	0	no	0	yes	1.3468	no	0	no	0	3
586	G33	July	LKWS	Harem	1.071	7	>0.3	yes	213.819	no	0	yes	213.819	no	0	no	0	yes	0.933707	yes	0.933707	no	0	no	0	yes	1.86741	no	0	no	0	3
587	G33	July	LKWS	Harem	0.629	7	>0.3	yes	216.216	yes	7.94913	yes	206.677	yes	1.58983	no	0	yes	3.17965	NA	NA	NA	NA	NA	0	no	0	no	0	no	0	NA
588	G33	July	LKWS	Harem	1.085	7	>0.3	yes	30.4147	no	0	yes	30.4147	no	0	no	0	yes	0.921659	yes	0.921659	no	0	no	0	yes	0.921659	no	0	no	0	3
589	G33	July	LKWS	Harem	0.638	7	>0.3	yes	757.053	no	0	yes	747.649	yes	9.40439	no	0	no	0	no	0	no	0	no	0	yes	4.7	no	0	no	0	3
590	G33	July	LKWS	Harem	0.871	7	>0.3	yes	41.3318	no	0	yes	22.9621	yes	18.3697	no	0	yes	1.14811	NA	NA	NA	NA	NA	0	no	0	no	0	no	0	NA
591	G33	July	LKWS	Harem	0.595	7	>0.3	yes	121.008	no	0	yes	119.328	no	0	yes	1.68067	no	0	no	0	no	0	no	0	no	0	no	0	no	0	2
592	G33	July	LKWS	Harem	0.827	7	>0.3	yes	97.9444	yes	2.41838	yes	94.3168	yes	1.20919	no	0	yes	4.83676	yes	3.62757	no	0	no	0	no	0	no	0	no	0	3
593	G33	July	LKWS	Harem	0.574	7	>0.3	yes	304.878	yes	1.74216	yes	299.652	yes	3.48432	no	0	yes	1.74216	no	0	yes	1.74216	no	0	yes	1.74216	no	0	no	0	4
595	G33	July	LKWS	Harem	0.865	7	>0.3	yes	172.254	no	0	yes	171.098	yes	1.15607	no	0	yes	2.31214	yes	2.31214	no	0	no	0	yes	5.78035	no	0	no	0	4
596	G33	July	LKWS	Harem	0.872	7	>0.3	yes	116.972	yes	3.44037	yes	111.239	yes	2.29358	no	0	yes	18.3486	yes	3.44037	yes	4.58716	no	0	no	0	no	0	no	0	4
597	G33	July	LKWS	Harem	0.852	7	>0.3	yes	136.15	no	0	yes	136.15	no	0	no	0	yes	3.52113	yes	1.17371	no	0	yes	0	yes	1.17371	no	0	no	0	4
599	G33	July	LKWS	Harem	1.27	7	>0.3	yes	839.37	no	0	yes	839.37	no	0	no	0	yes	7.08661	yes	3.93701	yes	1.5748	no	0	yes	0.787402	no	0	yes	0.787402	5
601	G33	July	LKWS	Harem	1.032	7	>0.3	yes	19.3798	no	0	yes	19.3798	no	0	no	0	yes	1.93798	yes	1.93798	no	0	no	0	no	0	no	0	no	0	2
603	G33	July	LKWS	Harem	0.714	7	>0.3	yes	149.86	yes	2.80112	yes	147.059	no	0	no	0	yes	2.80112	yes	1.40056	yes	1.40056	no	0	no	0	no	0	yes	1.40056	5
606	G34	July	LKWS	Bachelor	2	8	0	yes	1.5	no	0	yes	0.5	yes	1	no	0	no	0	no	0	no	0	no	0	no	0	no	0	no	0	2
607	G34	July	LKWS	Bachelor	2	8	0	no	0	no	0	no	0	no	0	no	0	yes	0.5	no	0	yes	0.5	no	0	no	0	no	0	yes	0.5	2
608	G34	July	LKWS	Bachelor	2	8	0	yes	3.5	no	0	yes	3	yes	0.5	no	0	yes	0.5	NA	NA	NA	NA	NA	0	no	0	no	0	no	0	NA
609	G34	July	LKWS	Bachelor	2	8	0	yes	3	no	0	yes	1	yes	2	no	0	yes	2.5	yes	1.5	no	0	no	0	yes	1.5	no	0	no	0	4
610	G34	July	LKWS	Bachelor	2.029	8	0	yes	NA	NA	NA	NA	NA	NA	NA	NA	NA	no	0	no	0	no	0	no	0	no	0	no	0	no	0	NA
611	G34	July	LKWS	Bachelor	2	8	0	yes	26	no	0	yes	26	no	0	no	0	no	0	no	0	no	0	no	0	no	0	no	0	yes	0.5	2
612	G34	July	LKWS	Bachelor	1.091	8	0	yes	NA	NA	NA	NA	NA	NA	NA	NA	NA	yes	1.83318	NA	NA	NA	NA	NA	0	no	0	no	0	no	0	NA
613	G34	July	LKWS	Bachelor	1.784	8	0	yes	NA	NA	NA	NA	NA	NA	NA	NA	NA	no	0	no	0	no	0	no	0	no	0	no	0	no	0	NA
614	G34	July	LKWS	Bachelor	0.929	8	0	yes	NA	NA	NA	NA	NA	NA	NA	NA	NA	no	0	no	0	no	0	no	0	no	0	no	0	no	0	NA
615	G34	July	LKWS	Bachelor	0.7	8	0	yes	NA	NA	NA	NA	NA	NA	NA	NA	NA	yes	2.85714	NA	NA	NA	NA	NA	0	no	0	no	0	no	0	NA
616	G34	July	LKWS	Bachelor	0.835	8	0	yes	NA	NA	NA	NA	NA	NA	NA	NA	NA	yes	10.7784	no	0	yes	8.38323	no	0	no	0	no	0	no	0	NA
617	G38	August	LKWS	Harem	2	10	<0.3	yes	1	no	0	yes	1	no	0	no	0	no	0	no	0	no	0	no	0	yes	2	yes	2	no	0	3
618	G38	August	LKWS	Harem	2	10	<0.3	yes	0.5	no	0	no	0	yes	0.5	no	0	yes	0.5	no	0	yes	0.5	no	0	yes	4	no	0	no	0	3
619	G38	August	LKWS	Harem	2	10	<0.3	no	0	no	0	no	0	no	0	no	0	yes	0.5	yes	0.5	no	0	no	0	no	0	no	0	no	0	1
620	G38	August	LKWS	Harem	2	10	<0.3	no	0	no	0	no	0	no	0	no	0	yes	1	yes	1	no	0	no	0	yes	2	no	0	no	0	2
621	G38	August	LKWS	Harem	2	10	<0.3	yes	4	no	0	yes	1	yes	3	no	0	yes	1.5	no	0	yes	1	no	0	no	0	no	0	no	0	3
622	G38	August	LKWS	Harem	1.965	10	<0.3	no	0	no	0	no	0	no	0	no	0	yes	0.508906	yes	0.508906	no	0	no	0	yes	0.508906	no	0	no	0	2
623	G38	August	LKWS	Harem	2	10	<0.3	no	0	no	0	no	0	no	0	no	0	no	0	no	0	no	0	no	0	no	0	no	0	no	0	0
624	G38	August	LKWS	Harem	2	10	<0.3	yes	1	no	0	yes	1	no	0	no	0	no	0	no	0	no	0	no	0	yes	2	no	0	no	0	2
625	G38	August	LKWS	Harem	2	10	<0.3	no	0	no	0	no	0	no	0	no	0	yes	1	yes	1	no	0	no	0	no	0	no	0	no	0	1
626	G38	August	LKWS	Harem	2	10	<0.3	no	0	no	0	no	0	no	0	no	0	no	0	no	0	no	0	no	0	no	0	no	0	no	0	0
627	G38	August	LKWS	Harem	2	10	<0.3	yes	0.5	no	0	yes	0.5	no	0	no	0	no	0	no	0	no	0	no	0	yes	2	no	0	no	0	2
628	G38	August	LKWS	Harem	1.318	10	<0.3	no	0	no	0	no	0	no	0	no	0	yes	0.758725	yes	0.758725	no	0	no	0	no	0	no	0	no	0	1
629	G38	August	LKWS	Harem	2	10	<0.3	yes	7	no	0	yes	5	yes	2	no	0	no	0	no	0	no	0	no	0	yes	5	no	0	no	0	3
630	G38	August	LKWS	Harem	1.952	10	<0.3	yes	4.09836	no	0	yes	4.09836	no	0	no	0	no	0	no	0	no	0	no	0	no	0	no	0	no	0	1
631	G38	August	LKWS	Harem	2	10	<0.3	yes	36	no	0	yes	36	no	0	no	0	no	0	no	0	no	0	no	0	no	0	no	0	no	0	1
632	G38	August	LKWS	Harem	2	10	<0.3	no	0	no	0	no	0	no	0	no	0	no	0	no	0	no	0	no	0	no	0	no	0	no	0	0
633	G38	August	LKWS	Harem	2	10	<0.3	yes	8	no	0	yes	7.5	yes	0.5	no	0	yes	0.5	yes	0.5	no	0	no	0	yes	1.5	yes	0.5	no	0	5
634	G38	August	LKWS	Harem	2	10	<0.3	yes	7	no	0	yes	7	no	0	no	0	yes	1	no	0	yes	1	no	0	no	0	no	0	no	0	2
635	G38	August	LKWS	Harem	1.697	10	<0.3	no	0	no	0	no	0	no	0	no	0	no	0	no	0	no	0	no	0	no	0	no	0	no	0	0
636	G38	August	LKWS	Harem	2	10	<0.3	yes	1	no	0	no	0	yes	1	no	0	no	0	no	0	no	0	no	0	no	0	no	0	no	0	1
638	G38	August	LKWS	Harem	1.425	10	<0.3	yes	6.31579	no	0	yes	6.31579	no	0	no	0	no	0	no	0	no	0	no	0	no	0	no	0	no	0	1
639	G38	August	LKWS	Harem	1.103	10	<0.3	yes	15.4125	yes	0.906618	yes	12.6927	yes	1.81324	no	0	yes	0.906618	yes	0.906618	no	0	no	0	no	0	no	0	no	0	3
640	G38	August	LKWS	Harem	1.542	10	<0.3	no	0	no	0	no	0	no	0	no	0	no	0	no	0	no	0	no	0	yes	0.648508	no	0	no	0	1
641	G38	August	LKWS	Harem	1.437	10	<0.3	yes	7.65484	no	0	yes	7.65484	no	0	no	0	yes	2.08768	yes	1.39179	yes	0.695894	no	0	no	0	no	0	no	0	3
642	G38	August	LKWS	Harem	1.312	10	<0.3	yes	15.2439	no	0	yes	14.4817	yes	0.762195	no	0	yes	1.52439	yes	0.762195	yes	0.762195	no	0	no	0	no	0	no	0	4
644	G38	August	LKWS	Harem	1.891	10	<0.3	yes	0.528821	no	0	yes	0.528821	no	0	no	0	no	0	no	0	no	0	no	0	no	0	no	0	no	0	1
645	G38	August	LKWS	Harem	0.753	10	<0.3	yes	84.9934	yes	1.32802	yes	82.3373	yes	1.32802	no	0	yes	1.32802	yes	1.32802	no	0	no	0	yes	1.32802	no	0	no	0	4
646	G38	August	LKWS	Harem	0.849	10	<0.3	yes	1.17786	no	0	no	0	yes	1.17786	no	0	no	0	no	0	no	0	no	0	no	0	yes	1.17786	no	0	2
647	G38	August	LKWS	Harem	1.592	10	<0.3	yes	0.628141	no	0	yes	0.628141	no	0	no	0	yes	1.25628	no	0	yes	1.25628	no	0	no	0	no	0	no	0	2
648	G38	August	LKWS	Harem	1.51	10	<0.3	no	0	no	0	no	0	no	0	no	0	no	0	no	0	no	0	no	0	no	0	no	0	no	0	0
649	G38	August	LKWS	Harem	1.159	10	<0.3	no	0	no	0	no	0	no	0	no	0	yes	1.72563	no	0	yes	1.72563	no	0	no	0	no	0	no	0	1
650	G38	August	LKWS	Harem	0.809	10	<0.3	no	0	no	0	no	0	no	0	no	0	no	0	no	0	no	0	no	0	no	0	no	0	no	0	0
651	G38	August	LKWS	Harem	2	10	<0.3	yes	1	no	0	yes	1	no	0	no	0	no	0	no	0	no	0	no	0	no	0	no	0	no	0	1
652	G39	August	LKWS	Harem	2	14	<0.3	no	0	no	0	no	0	no	0	no	0	no	0	no	0	no	0	no	0	yes	6	no	0	no	0	1
653	G39	August	LKWS	Harem	2	14	<0.3	yes	4	no	0	yes	3	yes	1	no	0	no	0	no	0	no	0	no	0	yes	2	no	0	no	0	3
654	G39	August	LKWS	Harem	2	14	<0.3	yes	1	no	0	yes	1	no	0	no	0	no	0	no	0	no	0	no	0	no	0	no	0	no	0	1
655	G39	August	LKWS	Harem	2	14	<0.3	yes	15	no	0	yes	15	no	0	no	0	yes	1	yes	0.5	no	0	no	0	yes	3	yes	2	no	0	4
656	G39	August	LKWS	Harem	2	14	<0.3	yes	11	no	0	yes	11	no	0	no	0	no	0	no	0	no	0	no	0	yes	1	no	0	no	0	2
657	G39	August	LKWS	Harem	2	14	<0.3	yes	6	no	0	yes	6	no	0	no	0	yes	2	yes	0.5	yes	0.5	no	0	no	0	no	0	no	0	3
658	G39	August	LKWS	Harem	2	14	<0.3	yes	1	no	0	yes	1	no	0	no	0	yes	1	yes	0.5	no	0	no	0	no	0	no	0	no	0	2
659	G39	August	LKWS	Harem	2	14	<0.3	yes	7	no	0	yes	7	no	0	no	0	yes	1	yes	0.5	no	0	no	0	yes	11	no	0	no	0	3
660	G39	August	LKWS	Harem	2	14	<0.3	yes	1	no	0	yes	1	no	0	no	0	no	0	no	0	no	0	no	0	yes	2	no	0	no	0	2
661	G39	August	LKWS	Harem	2	14	<0.3	yes	5	no	0	yes	3	yes	2	no	0	yes	1	no	0	yes	0.5	no	0	yes	1	no	0	no	0	4
662	G39	August	LKWS	Harem	2	14	<0.3	yes	7	no	0	yes	7	no	0	no	0	yes	1	no	0	yes	0.5	no	0	yes	7	no	0	no	0	3
663	G39	August	LKWS	Harem	2	14	<0.3	yes	2	no	0	yes	1	yes	1	no	0	yes	2	yes	1	no	0	no	0	yes	9	no	0	no	0	4
664	G39	August	LKWS	Harem	2	14	<0.3	yes	98	yes	1	yes	97	no	0	no	0	yes	2	yes	0.5	no	0	no	0	yes	1	no	0	no	0	3
665	G39	August	LKWS	Harem	2	14	<0.3	no	0	no	0	no	0	no	0	no	0	no	0	no	0	no	0	no	0	yes	7	no	0	no	0	1
666	G39	August	LKWS	Harem	2	14	<0.3	yes	18	no	0	yes	17	yes	1	no	0	no	0	no	0	no	0	no	0	yes	1	no	0	no	0	3
667	G39	August	LKWS	Harem	2	14	<0.3	yes	38	no	0	yes	38	no	0	no	0	yes	1	yes	0.5	no	0	no	0	no	0	yes	1	no	0	3
668	G39	August	LKWS	Harem	1.506	14	<0.3	yes	18.5923	no	0	yes	17.9283	yes	0.664011	no	0	yes	4.64807	yes	2.65604	yes	0.664011	no	0	yes	0.664011	no	0	yes	0.664011	6
669	G39	August	LKWS	Harem	1.594	14	<0.3	yes	10.0376	no	0	yes	10.0376	no	0	no	0	no	0	no	0	no	0	no	0	yes	1.88206	no	0	no	0	2
670	G39	August	LKWS	Harem	2	14	<0.3	yes	26	no	0	yes	26	no	0	no	0	yes	2	yes	1	no	0	no	0	yes	2	no	0	no	0	3
672	G39	August	LKWS	Harem	1.494	14	<0.3	yes	1.33869	no	0	yes	1.33869	no	0	no	0	yes	3.34672	yes	3.34672	no	0	no	0	yes	4.01606	no	0	no	0	3
673	G39	August	LKWS	Harem	1.181	14	<0.3	yes	6.77392	no	0	yes	6.77392	no	0	no	0	yes	1.69348	yes	0.84674	yes	0.84674	no	0	yes	0.84674	no	0	no	0	4
674	G39	August	LKWS	Harem	0.825	14	<0.3	yes	248.485	no	0	yes	248.485	no	0	no	0	yes	9.69697	yes	6.06061	yes	2.42424	no	0	yes	1.21212	no	0	no	0	4
675	G39	August	LKWS	Harem	0.666	14	<0.3	no	0	no	0	no	0	no	0	no	0	yes	6.00601	yes	6.00601	no	0	no	0	no	0	no	0	no	0	1
676	G39	August	LKWS	Harem	0.465	14	<0.3	no	0	no	0	no	0	no	0	no	0	yes	6.45161	yes	6.45161	no	0	no	0	yes	2.15054	no	0	no	0	2
678	G39	August	LKWS	Harem	0.493	14	<0.3	yes	32.4544	no	0	yes	32.4544	no	0	no	0	yes	2.0284	yes	2.0284	no	0	no	0	yes	2.0284	no	0	no	0	3
680	G39	August	LKWS	Harem	0.749	14	<0.3	yes	57.4099	no	0	yes	56.0748	yes	1.33511	no	0	yes	1.33511	no	0	yes	1.33511	no	0	no	0	no	0	no	0	3
682	G39	August	LKWS	Harem	0.745	14	<0.3	yes	255.034	yes	1.34228	yes	253.691	no	0	no	0	yes	1.34228	yes	1.34228	no	0	no	0	no	0	no	0	no	0	3
684	G39	August	LKWS	Harem	0.678	14	<0.3	yes	162.242	no	0	yes	162.242	no	0	no	0	yes	13.2743	yes	10.3245	yes	2.94985	no	0	no	0	no	0	no	0	3
688	G41	September	LKWS	Harem	2	17	>0.3	yes	4	no	0	yes	4	no	0	no	0	yes	1	yes	1	no	0	no	0	yes	1	no	0	no	0	3
689	G41	September	LKWS	Harem	2	17	>0.3	yes	8	no	0	yes	8	no	0	no	0	no	0	no	0	no	0	no	0	yes	0.5	no	0	no	0	2
690	G41	September	LKWS	Harem	1.589	17	>0.3	yes	NA	NA	NA	NA	NA	NA	NA	NA	NA	yes	2.51731	NA	NA	NA	NA	NA	0	yes	3.1	no	0	no	0	NA
691	G41	September	LKWS	Harem	2	17	>0.3	yes	213	no	0	yes	212	no	0	yes	1	yes	8.5	yes	7	yes	1	no	0	no	0	no	0	no	0	4
692	G41	September	LKWS	Harem	0.774	17	>0.3	yes	NA	NA	NA	NA	NA	NA	NA	NA	NA	yes	3.87597	NA	NA	NA	NA	NA	0	yes	16.8	no	0	no	0	NA
693	G41	September	LKWS	Harem	2	17	>0.3	no	0	no	0	no	0	no	0	no	0	no	0	no	0	no	0	no	0	yes	1	no	0	no	0	1
694	G41	September	LKWS	Harem	1.391	17	>0.3	yes	NA	NA	NA	NA	NA	NA	NA	NA	NA	yes	2.15672	NA	NA	NA	NA	NA	0	yes	1.4	no	0	no	0	NA
695	G41	September	LKWS	Harem	0.734	17	>0.3	yes	NA	NA	NA	NA	NA	NA	NA	NA	NA	yes	1.3624	NA	NA	NA	NA	NA	0	yes	1.4	no	0	no	0	NA
696	G41	September	LKWS	Harem	0.765	17	>0.3	yes	NA	NA	NA	NA	NA	NA	NA	NA	NA	yes	2.61438	NA	NA	NA	NA	NA	0	yes	5.2	no	0	no	0	NA
697	G41	September	LKWS	Harem	1.043	17	>0.3	yes	NA	NA	NA	NA	NA	NA	NA	NA	NA	yes	0.958773	yes	0.958773	no	0	no	0	yes	1	no	0	no	0	NA
698	G41	September	LKWS	Harem	0.722	17	>0.3	yes	NA	NA	NA	NA	NA	NA	NA	NA	NA	yes	4.15512	NA	NA	NA	NA	NA	0	yes	5.5	no	0	no	0	NA
699	G41	September	LKWS	Harem	0.73	17	>0.3	yes	NA	NA	NA	NA	NA	NA	NA	NA	NA	yes	2.73973	NA	NA	NA	NA	NA	0	yes	1.4	no	0	no	0	NA
700	G41	September	LKWS	Harem	0.847	17	>0.3	yes	NA	NA	NA	NA	NA	NA	NA	NA	NA	yes	11.8064	NA	NA	NA	NA	NA	0	no	0	no	0	no	0	NA
701	G41	September	LKWS	Harem	0.703	17	>0.3	yes	8.53485	no	0	yes	8.53485	no	0	no	0	yes	4.26743	yes	2.84495	yes	1.42248	no	0	no	0	no	0	no	0	3
703	G41	September	LKWS	Harem	0.954	17	>0.3	yes	9.43396	no	0	yes	9.43396	no	0	no	0	yes	3.14465	yes	1.04822	no	0	yes	0	yes	3.14465	no	0	no	0	4
705	G42	September	LKWS	Harem	2	13	>0.3	yes	16	no	0	yes	12	yes	4	no	0	no	0	no	0	no	0	no	0	no	0	no	0	no	0	2
706	G42	September	LKWS	Harem	1.774	13	>0.3	yes	3.38219	no	0	no	0	yes	3.38219	no	0	yes	1.1274	yes	0.563698	no	0	yes	0	no	0	no	0	no	0	3
707	G42	September	LKWS	Harem	0.875	13	>0.3	yes	125.714	no	0	yes	120	yes	5.71429	no	0	yes	9.14286	yes	9.14286	no	0	no	0	yes	5.7	no	0	no	0	4
708	G42	September	LKWS	Harem	2	13	>0.3	yes	0.5	no	0	yes	0.5	no	0	no	0	yes	1.5	yes	1	yes	0.5	no	0	no	0	no	0	no	0	3
709	G42	September	LKWS	Harem	1.794	13	>0.3	yes	2.22965	no	0	yes	2.22965	no	0	no	0	yes	0.557414	no	0	yes	0.557414	no	0	yes	1.11483	no	0	no	0	3
710	G42	September	LKWS	Harem	1.226	13	>0.3	yes	14.6819	no	0	yes	11.4192	yes	3.26264	no	0	yes	2.44698	yes	1.63132	yes	0.815661	no	0	yes	0.815661	no	0	no	0	5
711	G42	September	LKWS	Harem	1.184	13	>0.3	yes	2.53378	no	0	yes	2.53378	no	0	no	0	no	0	no	0	no	0	no	0	no	0	no	0	no	0	1
712	G42	September	LKWS	Harem	1.158	13	>0.3	yes	31.9516	no	0	yes	22.4525	yes	9.49914	no	0	yes	5.18135	yes	4.31779	yes	0.863558	no	0	no	0	no	0	no	0	4
713	G42	September	LKWS	Harem	1.301	13	>0.3	yes	5.38048	no	0	yes	5.38048	no	0	no	0	yes	2.30592	yes	2.30592	no	0	no	0	yes	0.76864	no	0	no	0	3
714	G42	September	LKWS	Harem	0.868	13	>0.3	yes	2.30415	no	0	yes	2.30415	no	0	no	0	yes	2.30415	yes	1.15207	yes	1.15207	no	0	no	0	no	0	no	0	3
715	G42	September	LKWS	Harem	1.217	13	>0.3	yes	1.64339	no	0	no	0	yes	1.64339	no	0	no	0	no	0	no	0	no	0	no	0	no	0	no	0	1
716	G42	September	LKWS	Harem	0.652	13	>0.3	yes	13.8037	yes	1.53374	yes	12.2699	no	0	no	0	no	0	no	0	no	0	no	0	no	0	no	0	no	0	2
717	G42	September	LKWS	Harem	0.927	13	>0.3	yes	37.7562	no	0	yes	36.6775	yes	1.07875	no	0	no	0	no	0	no	0	no	0	yes	1.1	no	0	no	0	3
718	G42	September	LKWS	Harem	0.982	13	>0.3	yes	5.09165	no	0	yes	5.09165	no	0	no	0	no	0	no	0	no	0	no	0	no	0	no	0	no	0	1
719	G42	September	LKWS	Harem	0.899	13	>0.3	yes	12.2358	no	0	yes	3.33704	yes	8.89878	no	0	yes	3.33704	no	0	yes	1.11235	no	0	no	0	no	0	no	0	3
720	G42	September	LKWS	Harem	1.141	13	>0.3	no	0	no	0	no	0	no	0	no	0	yes	1.75285	yes	1.75285	no	0	no	0	no	0	no	0	no	0	1
721	G42	September	LKWS	Harem	0.596	13	>0.3	yes	30.2013	yes	6.71141	yes	18.4564	yes	5.03356	no	0	yes	1.67785	yes	1.67785	no	0	no	0	yes	1.7	no	0	no	0	4
723	G42	September	LKWS	Harem	0.695	13	>0.3	no	0	no	0	no	0	no	0	no	0	yes	1.43885	no	0	no	0	yes	0	no	0	no	0	no	0	1
725	G60	September	LBPMS	Bachelor	2	13	0	yes	NA	NA	NA	NA	NA	NA	NA	NA	NA	yes	0.5	yes	0.5	no	0	no	0	yes	0.5	no	0	no	0	NA
726	G60	September	LBPMS	Bachelor	2	13	0	yes	NA	NA	NA	NA	NA	NA	NA	NA	NA	yes	1	yes	0.5	yes	0.5	no	0	no	0	no	0	no	0	NA
727	G60	September	LBPMS	Bachelor	2	13	0	yes	NA	NA	NA	NA	NA	NA	NA	NA	NA	yes	19	yes	7.5	yes	4.5	no	0	yes	5	no	0	no	0	NA
730	G64	September	LBPMS	Harem	1	36	>0.3	yes	1	no	0	no	0	yes	1	no	0	no	0	no	0	no	0	no	0	no	0	no	0	no	0	1
731	G64	September	LBPMS	Harem	0.938	36	>0.3	yes	NA	NA	NA	NA	NA	NA	NA	NA	NA	no	0	no	0	no	0	no	0	yes	1.1	no	0	no	0	NA
732	G64	September	LBPMS	Harem	1	36	>0.3	yes	96	no	0	yes	92	yes	4	no	0	no	0	no	0	no	0	no	0	yes	3	no	0	no	0	3
733	G64	September	LBPMS	Harem	1	36	>0.3	no	0	no	0	no	0	no	0	no	0	no	0	no	0	no	0	no	0	no	0	no	0	no	0	0
734	G64	September	LBPMS	Harem	1.417	36	>0.3	yes	NA	NA	NA	NA	NA	NA	NA	NA	NA	no	0	no	0	no	0	no	0	no	0	no	0	no	0	NA
735	G64	September	LBPMS	Harem	1.433	36	>0.3	no	0	no	0	no	0	no	0	no	0	no	0	no	0	no	0	no	0	yes	1.4	no	0	yes	0.7	2
736	G64	September	LBPMS	Harem	1.1	36	>0.3	yes	41.8182	no	0	yes	30	yes	11.8182	no	0	yes	5.45455	yes	3.63636	yes	1.81818	no	0	yes	2	no	0	no	0	5
737	G64	September	LBPMS	Harem	1	36	>0.3	yes	281	no	0	yes	274	yes	7	no	0	no	0	no	0	no	0	no	0	yes	13	no	0	yes	1	4
738	G64	September	LBPMS	Harem	1	36	>0.3	yes	17	no	0	yes	2	yes	15	no	0	no	0	no	0	no	0	no	0	no	0	no	0	no	0	2
739	G64	September	LBPMS	Harem	1	36	>0.3	yes	101	yes	3	yes	96	yes	2	no	0	no	0	no	0	no	0	no	0	yes	3	no	0	no	0	3
740	G64	September	LBPMS	Harem	1.3	36	>0.3	yes	12.3077	yes	0.769231	yes	7.69231	yes	3.84615	no	0	no	0	no	0	no	0	no	0	no	0	no	0	no	0	2
741	G64	September	LBPMS	Harem	1.249	36	>0.3	yes	21.6173	yes	0.800641	yes	17.6141	yes	3.20256	no	0	no	0	no	0	no	0	no	0	yes	0.800641	no	0	no	0	3
742	G64	September	LBPMS	Harem	1.1	36	>0.3	no	0	no	0	no	0	no	0	no	0	no	0	no	0	no	0	no	0	no	0	no	0	no	0	0
743	G64	September	LBPMS	Harem	2	36	>0.3	no	0	no	0	no	0	no	0	no	0	no	0	no	0	no	0	no	0	no	0	no	0	no	0	0
744	G64	September	LBPMS	Harem	1.1	36	>0.3	yes	3.63636	no	0	no	0	yes	3.63636	no	0	no	0	no	0	no	0	no	0	no	0	no	0	no	0	1
745	G64	September	LBPMS	Harem	1.075	36	>0.3	yes	NA	NA	NA	NA	NA	NA	NA	NA	NA	no	0	no	0	no	0	no	0	no	0	no	0	no	0	NA
746	G64	September	LBPMS	Harem	1	36	>0.3	yes	42	no	0	yes	39	yes	3	no	0	no	0	no	0	no	0	no	0	no	0	no	0	no	0	2
747	G64	September	LBPMS	Harem	0.446	36	>0.3	yes	266.816	yes	2.24215	yes	260.09	yes	4.4843	no	0	no	0	no	0	no	0	no	0	yes	2.24215	no	0	no	0	3
748	G63	September	LBPMS	Harem	2	21	<0.3	no	0	no	0	no	0	no	0	no	0	yes	1	yes	0.5	no	0	no	0	yes	2	no	0	no	0	2
751	G65	September	LBPMS	NA	2	NA	NA	yes	4.5	no	0	yes	3	yes	1.5	no	0	no	0	no	0	no	0	no	0	yes	9	no	0	no	0	3
752	G65	September	LBPMS	NA	1.66	NA	NA	yes	15.6627	no	0	yes	14.4578	yes	1.20482	no	0	yes	0.60241	NA	NA	NA	NA	NA	0	yes	4.81928	no	0	no	0	NA
753	G65	September	LBPMS	NA	2	NA	NA	yes	41.5	no	0	yes	37	yes	4.5	no	0	no	0	no	0	no	0	no	0	yes	13.5	no	0	no	0	3
754	G65	September	LBPMS	NA	2	NA	NA	yes	33	no	0	yes	32.5	yes	0.5	no	0	yes	9.5	yes	4	yes	5.5	no	0	yes	10	no	0	no	0	5
755	G65	September	LBPMS	NA	0.419	NA	NA	yes	274.463	no	0	yes	269.69	yes	4.77327	no	0	no	0	no	0	no	0	no	0	no	0	no	0	no	0	2
757	G61	September	LBPMS	Bachelor	2	19	0	yes	56	no	0	yes	2.5	yes	53.5	no	0	yes	5	yes	2.5	yes	2	yes	0	yes	1	no	0	no	0	6
758	G65	September	LBPMS	NA	2	NA	NA	yes	1	no	0	yes	1	no	0	no	0	no	0	no	0	no	0	no	0	no	0	no	0	no	0	1
759	G65	September	LBPMS	NA	2	NA	NA	yes	1	no	0	yes	0.5	yes	0.5	no	0	no	0	no	0	no	0	no	0	no	0	no	0	no	0	2
760	G65	September	LBPMS	NA	1.163	NA	NA	yes	12.8977	no	0	yes	11.178	yes	1.71969	no	0	no	0	no	0	no	0	no	0	no	0	no	0	no	0	2
761	G65	September	LBPMS	NA	1.342	NA	NA	yes	0.745156	no	0	yes	0.745156	no	0	no	0	no	0	no	0	no	0	no	0	yes	1.49031	no	0	no	0	2
762	G62	September	LBPMS	Harem	2	35	>0.3	yes	NA	NA	NA	NA	NA	NA	NA	NA	NA	yes	1	no	0	yes	1	no	0	no	0	no	0	no	0	NA
763	G62	September	LBPMS	Harem	2	35	>0.3	yes	NA	NA	NA	NA	NA	NA	NA	NA	NA	yes	0.5	yes	0.5	no	0	no	0	yes	7	no	0	no	0	NA
764	G62	September	LBPMS	Harem	2	35	>0.3	yes	NA	NA	NA	NA	NA	NA	NA	NA	NA	yes	1.5	yes	0.5	yes	1	no	0	no	0	no	0	no	0	NA
765	G62	September	LBPMS	Harem	2	35	>0.3	yes	NA	NA	NA	NA	NA	NA	NA	NA	NA	yes	1.5	yes	0.5	yes	1	no	0	no	0	no	0	no	0	NA
766	G62	September	LBPMS	Harem	2	35	>0.3	yes	NA	NA	NA	NA	NA	NA	NA	NA	NA	yes	23.5	yes	12.5	yes	11	no	0	yes	4	no	0	no	0	NA
767	G62	September	LBPMS	Harem	1.443	35	>0.3	yes	NA	NA	NA	NA	NA	NA	NA	NA	NA	yes	32.571	yes	2.772	yes	28.413	yes	0	yes	99.8	no	0	no	0	NA
771	G63	October	LBPMS	Harem	2	21	<0.3	yes	83.5	yes	0.5	no	0	yes	83	no	0	yes	5.5	yes	2	yes	3	yes	0	yes	1	no	0	no	0	5
773	G68	October	LBPMS	Harem	1.67	NA	NA	yes	70.0599	yes	1.1976	yes	68.2635	no	0	yes	0.598802	yes	25.1497	yes	5.98802	yes	18.5629	no	0	yes	13.2	no	0	no	0	6
774	G68	October	LBPMS	Harem	0.564	NA	NA	yes	1875.89	no	0	yes	1875.89	no	0	no	0	yes	70.922	yes	40.7801	yes	12.4113	yes	0	yes	26.6	no	0	no	0	5
775	G68	October	LBPMS	Harem	2	NA	NA	yes	2.5	no	0	yes	1.5	yes	1	no	0	yes	1.5	yes	1	no	0	no	0	no	0	no	0	no	0	3
776	G64	October	LBPMS	Harem	2	36	>0.3	yes	NA	NA	NA	NA	NA	NA	NA	NA	NA	no	0	no	0	no	0	no	0	no	0	no	0	no	0	NA
777	G64	October	LBPMS	Harem	2	36	>0.3	no	0	no	0	no	0	no	0	no	0	no	0	no	0	no	0	no	0	no	0	no	0	no	0	0
778	G64	October	LBPMS	Harem	1	36	>0.3	yes	74	yes	2	yes	67	yes	5	no	0	no	0	no	0	no	0	no	0	yes	12	no	0	no	0	3
779	G64	October	LBPMS	Harem	1	36	>0.3	yes	307	no	0	yes	300	yes	7	no	0	yes	6	yes	3	yes	3	no	0	no	0	no	0	no	0	4
780	G64	October	LBPMS	Harem	2	36	>0.3	yes	41	no	0	yes	41	no	0	no	0	yes	8	yes	3.5	yes	4	no	0	yes	4	no	0	no	0	4
781	G64	October	LBPMS	Harem	1.2	36	>0.3	yes	35	no	0	yes	34.1667	yes	0.833333	no	0	yes	0.833333	NA	NA	NA	NA	NA	0	no	0	no	0	no	0	NA
782	G64	October	LBPMS	Harem	0.982	36	>0.3	yes	54.9898	yes	1.01833	yes	53.9715	no	0	no	0	no	0	no	0	no	0	no	0	yes	1	no	0	no	0	3
783	G64	October	LBPMS	Harem	1	36	>0.3	yes	108	no	0	yes	106	yes	2	no	0	no	0	no	0	no	0	no	0	yes	4	no	0	no	0	3
784	G64	October	LBPMS	Harem	1	36	>0.3	yes	136	yes	2	yes	116	yes	18	no	0	no	0	no	0	no	0	no	0	yes	1	no	0	no	0	3
785	G64	October	LBPMS	Harem	1.987	36	>0.3	yes	4.52944	no	0	yes	4.52944	no	0	no	0	yes	0.503271	yes	0.503271	no	0	no	0	no	0	no	0	no	0	2
786	G64	October	LBPMS	Harem	1.058	36	>0.3	yes	11.3422	yes	0.94518	yes	9.4518	yes	0.94518	no	0	no	0	no	0	no	0	no	0	yes	0.94518	no	0	no	0	3
787	G64	October	LBPMS	Harem	1.718	36	>0.3	no	0	no	0	no	0	no	0	no	0	no	0	no	0	no	0	no	0	no	0	no	0	no	0	0
788	G64	October	LBPMS	Harem	1.077	36	>0.3	yes	46.4253	no	0	yes	46.4253	no	0	no	0	yes	2.78552	no	0	yes	2.78552	no	0	no	0	no	0	no	0	2
789	G64	October	LBPMS	Harem	0.502	36	>0.3	yes	215.139	no	0	yes	209.163	yes	5.9761	no	0	yes	3.98406	yes	3.98406	no	0	no	0	yes	1.99203	no	0	no	0	4
790	G61	October	LBPMS	Bachelor	2	19	0	yes	47.5	no	0	yes	4	yes	43.5	no	0	no	0	no	0	no	0	no	0	yes	10	no	0	no	0	3
791	G61	October	LBPMS	Bachelor	0.535	19	0	yes	18.6916	no	0	yes	5.60748	yes	13.0841	no	0	no	0	no	0	no	0	no	0	no	0	no	0	no	0	2
792	G68	October	LBPMS	Harem	2	NA	NA	yes	116	no	0	yes	113.5	yes	2.5	no	0	yes	13	yes	0.5	yes	12.5	no	0	yes	19.5	no	0	no	0	5
793	G68	October	LBPMS	Harem	2	NA	NA	yes	11.5	no	0	no	0	yes	11.5	no	0	yes	1.5	no	0	yes	1.5	no	0	yes	2	no	0	no	0	3
796	G60	October	LBPMS	Bachelor	2	13	0	yes	NA	NA	NA	NA	NA	NA	NA	NA	NA	yes	3	yes	1	yes	2	no	0	yes	1.5	no	0	no	0	NA
797	G60	October	LBPMS	Bachelor	1.964	13	0	yes	NA	NA	NA	NA	NA	NA	NA	NA	NA	no	0	no	0	no	0	no	0	yes	18.3	no	0	no	0	NA
798	G64	October	LBPMS	Harem	1	36	>0.3	yes	75	no	0	yes	75	no	0	no	0	no	0	no	0	no	0	no	0	yes	5	no	0	no	0	2
799	G64	October	LBPMS	Harem	1.375	36	>0.3	yes	0.727273	no	0	no	0	yes	0.727273	no	0	yes	0.727273	NA	NA	NA	NA	NA	0	yes	0.7	no	0	no	0	NA
800	G64	October	LBPMS	Harem	2	36	>0.3	yes	NA	NA	NA	NA	NA	NA	NA	NA	NA	no	0	no	0	no	0	no	0	no	0	no	0	no	0	NA
801	G64	October	LBPMS	Harem	1	36	>0.3	yes	13	no	0	yes	9	yes	4	no	0	no	0	no	0	no	0	no	0	yes	11	no	0	no	0	3
802	G64	October	LBPMS	Harem	0.733	36	>0.3	yes	49.1132	no	0	yes	47.749	yes	1.36426	no	0	no	0	no	0	no	0	no	0	yes	6.82128	no	0	no	0	3
803	G64	October	LBPMS	Harem	1	36	>0.3	no	0	no	0	no	0	no	0	no	0	no	0	no	0	no	0	no	0	yes	2	no	0	no	0	1
804	G64	October	LBPMS	Harem	1.1	36	>0.3	yes	6.36364	no	0	yes	5.45455	yes	0.909091	no	0	no	0	no	0	no	0	no	0	yes	0.909091	no	0	no	0	3
805	G64	October	LBPMS	Harem	1.32	36	>0.3	yes	9.84848	no	0	yes	9.09091	yes	0.757576	no	0	no	0	no	0	no	0	no	0	yes	0.757576	no	0	no	0	3
806	G64	October	LBPMS	Harem	1	36	>0.3	yes	29	no	0	yes	29	no	0	no	0	yes	8	yes	4	yes	4	no	0	yes	5	no	0	no	0	4
807	G64	October	LBPMS	Harem	1	36	>0.3	yes	3	no	0	no	0	yes	3	no	0	no	0	no	0	no	0	no	0	yes	11	no	0	no	0	2
808	G64	October	LBPMS	Harem	1.456	36	>0.3	yes	75.5495	no	0	yes	70.7418	yes	4.80769	no	0	no	0	no	0	no	0	no	0	no	0	no	0	no	0	2
809	G64	October	LBPMS	Harem	1	36	>0.3	yes	96	no	0	yes	92	yes	4	no	0	no	0	no	0	no	0	no	0	yes	1	no	0	no	0	3
810	G64	October	LBPMS	Harem	1.291	36	>0.3	yes	3.09837	no	0	yes	2.32378	yes	0.774593	no	0	no	0	no	0	no	0	no	0	no	0	no	0	no	0	2
811	G64	October	LBPMS	Harem	0.8	36	>0.3	yes	197.5	no	0	yes	190	yes	7.5	no	0	yes	1.25	yes	1.25	no	0	no	0	yes	6.25	no	0	no	0	4
812	G64	October	LBPMS	Harem	0.847	36	>0.3	yes	184.179	no	0	yes	132.231	yes	51.9481	no	0	no	0	no	0	no	0	no	0	yes	3.5	no	0	no	0	3
813	G64	October	LBPMS	Harem	2	36	>0.3	yes	NA	NA	NA	NA	NA	NA	NA	NA	NA	no	0	no	0	no	0	no	0	yes	2.5	no	0	no	0	NA
814	G64	October	LBPMS	Harem	1.473	36	>0.3	yes	50.2376	no	0	yes	42.091	yes	8.14664	no	0	yes	0.678887	yes	0.678887	no	0	no	0	yes	6.78887	no	0	no	0	4
815	G66	October	LBPMS	NA	2	NA	0	yes	1.5	no	0	yes	1.5	no	0	no	0	no	0	no	0	no	0	no	0	yes	2	no	0	no	0	2
816	G66	October	LBPMS	NA	2	NA	0	yes	4.5	no	0	yes	3	yes	1.5	no	0	no	0	no	0	no	0	no	0	no	0	no	0	no	0	2
818	G66	October	LBPMS	NA	2	NA	0	yes	5	no	0	yes	3	yes	2	no	0	yes	1	yes	0.5	yes	0.5	no	0	yes	0.5	no	0	no	0	5
819	G66	October	LBPMS	NA	1.246	NA	0	yes	81.0594	no	0	yes	77.8491	yes	3.21027	no	0	yes	8.02568	yes	2.4077	yes	5.61798	no	0	yes	0.802568	no	0	no	0	5
820	G66	October	LBPMS	NA	1.686	NA	0	yes	57.5326	no	0	yes	52.1945	yes	5.33808	no	0	yes	4.15184	yes	1.77936	yes	2.37248	no	0	yes	2.9656	no	0	no	0	5
822	G62	October	LBPMS	Harem	0.873	35	>0.3	yes	NA	NA	NA	NA	NA	NA	NA	NA	NA	yes	4.5819	NA	NA	NA	NA	NA	0	yes	14.9	no	0	no	0	NA
823	G62	October	LBPMS	Harem	2	35	>0.3	yes	26	no	0	yes	25	no	0	yes	1	yes	1.5	no	0	yes	1.5	no	0	yes	8	no	0	no	0	4
824	G62	October	LBPMS	Harem	2	35	>0.3	yes	NA	NA	NA	NA	NA	NA	NA	NA	NA	no	0	no	0	no	0	no	0	yes	1.5	no	0	no	0	NA
825	G67	October	LBPMS	NA	2	NA	NA	yes	18.5	no	0	yes	12	yes	6.5	no	0	yes	14.5	yes	4.5	yes	10	no	0	yes	3	no	0	no	0	5
826	G67	October	LBPMS	NA	1.281	NA	NA	yes	113.973	no	0	yes	93.6768	yes	20.2966	no	0	yes	7.8064	yes	4.68384	yes	0.78064	no	0	yes	176.425	no	0	no	0	5
827	G67	October	LBPMS	NA	2	NA	NA	yes	48.5	no	0	yes	35	yes	13.5	no	0	yes	3	yes	1.5	yes	0.5	no	0	yes	38.5	no	0	no	0	5
